# 1 TDP-43 oligomerization and RNA binding are codependent but their loss elicits distinct 2 pathologies

3  
4 Manuela Pérez-Berlanga<sup>1</sup>, Vera I. Wiersma<sup>1†</sup>, Aurélie Zbinden<sup>1†</sup>, Laura De Vos<sup>1</sup>, Ulrich Wagner<sup>2</sup>,  
5 Chiara Foglieni<sup>3</sup>, Izaskun Mallona<sup>1</sup>, Katharina M. Betz<sup>1</sup>, Antoine Cléry<sup>4</sup>, Julien Weber<sup>1</sup>, Zhongning  
6 Guo<sup>1</sup>, Ruben Rigort<sup>1</sup>, Pierre de Rossi<sup>1</sup>, Ruchi Manglunia<sup>1</sup>, Elena Tantardini<sup>1</sup>, Sonu Sahadevan<sup>1</sup>,  
7 Oliver Stach<sup>5</sup>, Marian Hruska-Plochan<sup>1</sup>, Frederic H.-T. Allain<sup>4</sup>, Paolo Paganetti<sup>3</sup>, Magdalini  
8 Polymenidou<sup>1\*</sup>

9  
10 † These authors contributed equally

11 <sup>1</sup> Department of Quantitative Biomedicine, University of Zurich, Winterthurerstrasse 190, 8057  
12 Zurich, Switzerland

13 <sup>2</sup> Department of Pathology and Molecular Pathology, University Hospital Zurich, University of  
14 Zurich, Zurich, Switzerland

15 <sup>3</sup> Neurodegeneration Research Group, Laboratory for Biomedical Neurosciences, Neurocenter of  
16 Southern Switzerland, Ente Ospedaliero Cantonale, Via ai Söi 24, Bellinzona CH-6807,  
17 Switzerland

18 <sup>4</sup> Department of Biology, Institute of Biochemistry, ETH Zurich, Zurich, Switzerland

19 <sup>5</sup> Department of Biochemistry, University of Zurich, Winterthurerstrasse 190, 8057 Zurich,  
20 Switzerland

21 \* Corresponding author: [magdalini.polymenidou@uzh.ch](mailto:magdalini.polymenidou@uzh.ch)

## 23 Short title

24 Oligomerization modulates TDP-43 aggregation patterns

## 26 Abstract

27 Aggregation of the RNA-binding protein TDP-43 is the main common neuropathological feature  
28 of TDP-43 proteinopathies. In physiological conditions, TDP-43 is predominantly nuclear and  
29 contained in biomolecular condensates formed via liquid-liquid phase separation (LLPS). However,  
30 in disease, TDP-43 is depleted from these compartments and forms cytoplasmic or, sometimes,  
31 intranuclear inclusions. How TDP-43 transitions from physiological to pathological states remains  
32 poorly understood. Here, we show that self-oligomerization and RNA binding cooperatively govern  
33 TDP-43 stability, functionality, LLPS and cellular localization. Importantly, our data reveal that  
34 TDP-43 oligomerization is connected to, and conformationally modulated by, RNA binding.  
35 Mimicking the impaired proteasomal activity observed in patients, we found that TDP-43 forms  
36 nuclear aggregates via LLPS and cytoplasmic aggregates via aggresome formation. The favored  
37 aggregation pathway depended on the TDP-43 state –monomeric/oligomeric, RNA-bound/-  
38 unbound– and the subcellular environment –nucleus/cytoplasm. Our work unravels the origins of  
39 heterogeneous pathological species occurring in TDP-43 proteinopathies.

## 40 MAIN TEXT

### 41 Introduction

42 Amyotrophic lateral sclerosis (ALS) and frontotemporal lobar degeneration (FTLD) are two  
43 seemingly different, devastating adult-onset neurodegenerative diseases that exhibit a  
44 significant genetic, clinical and pathological overlap (1). The vast majority of ALS patients  
45 and up to half of FTLD cases are characterized by the accumulation of aggregated TAR  
46 DNA-binding protein 43 (TDP-43) in affected neurons (1–3). Importantly, TDP-43  
47 pathology is not an exclusive hallmark of ALS and FTLD, but is also the main pathological  
48 feature in limbic-predominant age-related TDP-43 encephalopathy (LATE) (4) and a  
49 concomitant pathology in a subset of patients with other neurodegenerative diseases  
50 including Alzheimer’s, Parkinson’s and Huntington’s disease (5). However, TDP-43  
51 aggregates associated with different clinical subtypes present distinct subcellular  
52 localization, namely cytoplasmic, intranuclear or axonal (6, 7), as well as morphological  
53 and biochemical properties (8–10), indicating a distinct molecular origin of these diverse  
54 pathological species.

55 TDP-43 is a ubiquitously expressed (11) and predominantly nuclear (12) nucleic acid-  
56 binding protein (11, 13) composed of an N-terminal domain (NTD, amino acids 1-80)  
57 involved in self-oligomerization (14, 15), two tandem RNA-recognition motifs (RRMs,  
58 amino acids 106-259) (13, 16) and an unstructured low complexity region (LCR, amino  
59 acids 260-414). The latter contains a transient  $\alpha$ -helix (amino acids 321-340) (17) that  
60 associates with interaction partners (18) and was recently shown to coincide with the  
61 aggregation core of pathological cytoplasmic TDP-43 in FTLD brains (19). Under  
62 physiological conditions in the nucleus, TDP-43 mainly binds UG-rich intronic sites on pre-  
63 mRNA to regulate alternative splicing (20, 21) and undergoes liquid-liquid phase separation  
64 (LLPS) (22) to form dynamic nuclear droplets (23–26), which were suggested to localize to  
65 specific subnuclear membraneless compartments (26, 27). Albeit its predominantly nuclear  
66 localization (12), TDP-43 shuttles between the nucleus and the cytoplasm (28), where it  
67 plays roles in mRNA stability, transport and translation, miRNA processing, mitochondrial  
68 and synaptic function and stress responses (1). In particular, TDP-43 was shown to  
69 incorporate into and modulate the dynamics of stress granules (SGs) upon exposure to  
70 different temperature, osmotic, oxidative and chemical stressors (29, 30).

71 RRM-mediated RNA binding is essential for TDP-43 to perform its physiological functions  
72 in RNA metabolism (31). In addition, RNA binding precludes TDP-43 passive leakage out  
73 of the nucleus (28, 32) and modulates its LLPS behavior (33, 34). In contrast, little is known  
74 about the importance of TDP-43 NTD-driven self-oligomerization in physiology. Previous  
75 data have shown that nuclear TDP-43 oligomerization is required for alternative splicing of  
76 at least a subset of its known RNA targets (15, 35–38). However, the role of TDP-43  
77 oligomerization in its physiological properties, including its subcellular localization,  
78 stability, LLPS behavior and cytoplasmic functions, remains poorly understood. Also,  
79 whether -and if so, how- TDP-43 RNA binding and oligomerization impact each other in  
80 cells is unknown.

81 The overexpression of TDP-43 in cellular and animal models results in its aggregation, a  
82 phenomenon that has been extensively explored in recent years to recapitulate the main  
83 neuropathological hallmark of ALS/FTLD (39). However, TDP-43 is a tightly  
84 autoregulated protein (20, 40) and overexpression can distort its subcellular (32) and  
85 subnuclear (24, 27) localization, and potentially its functions. We therefore aimed to study  
86 the physiological role of TDP-43 oligomerization and its interplay with RNA binding at

87 near-physiological protein levels, and to subsequently compare the pathways triggered by  
88 their respective impairment. Using human neural cultures and single-copy expression  
89 systems in human cell lines, we show that NTD-driven TDP-43 oligomerization and RRM-  
90 mediated RNA binding are intertwined and required to maintain the half-life, functionality  
91 and localization of TDP-43. Upon failure of the ubiquitin-proteasome system (UPS),  
92 monomerization and impaired RNA binding triggered TDP-43 aggregation via distinct  
93 pathways in the cytoplasm and nucleus. Our results underscore the relevance of loss of  
94 oligomerization and RNA binding in the initiation of diverse TDP-43 pathologies and  
95 unravel the origins of heterogeneous pathological species occurring in human disease.

## 96 97 **Results**

### 98 **Oligomerization and RNA-binding cooperatively stabilize the half-life of TDP-43**

99 To systematically compare the properties of oligomeric, monomeric and RNA binding-  
100 deficient TDP-43, we introduced a single copy of an N-terminally green fluorescent protein  
101 (GFP)-tagged TDP-43 coding sequence under the control of a doxycycline-inducible  
102 promoter into HEK293 cells using the Flp-In T-REx technology (**Figure S1A**) (41). This  
103 construct harbored previously described point mutations that disrupt TDP-43  
104 oligomerization (termed 6M) (15), RNA binding through the RRM (five F>A mutations in  
105 the RRM, referred to as RRMm) (13, 16) or both 6M&RRMm (**Figure 1A**). The resulting  
106 four isogenic cell lines (WT, 6M, RRMm and 6M&RRMm) expressed equal levels of the  
107 exogenous GFP-TDP-43 RNA (**Figure S1B**) and both RNA and protein were detectable  
108 only upon addition of doxycycline (**Figures 1B and S1C-D**). Wild type (WT) GFP-TDP-  
109 43 protein levels displayed a mere 4-fold increase compared to endogenous TDP-43, as  
110 determined by immunoblot analysis (**Figure S1D**). However, despite equal RNA levels  
111 (**Figure S1B**), protein levels of the GFP-TDP-43 mutants were noticeably lower than their  
112 WT counterpart (**Figures 1B-C and S1E-G**). A protein turnover analysis using the  
113 translation inhibitor cycloheximide (CHX) showed that the half-life of the RNA-binding  
114 TDP-43 mutant was reduced by >8 hours compared to WT GFP-TDP-43 (**Figure 1D-E**),  
115 consistent with previous findings (42). Interestingly, oligomerization deficiency (6M) and  
116 loss of RNA binding had a similar effect on the half-life of TDP-43. Furthermore, the  
117 combined variant (6M&RRMm) presented a cumulative effect (**Figure 1D-E**). Since point  
118 mutations can affect protein folding and thereby selectively target proteins for degradation  
119 (43), we confirmed that the introduced mutations do not interfere with the folding of TDP-  
120 43 using circular dichroism (CD) (**Figure 1F and S1H**) and two-dimensional nuclear  
121 magnetic resonance (2D-NMR) spectroscopy (**Figure S1I-J**) (15, 44), which revealed that  
122 the mutated domains are properly folded. Therefore, our results indicate that loss of  
123 oligomerization or RNA-binding ability similarly reduces the half-life of TDP-43. Since  
124 incorporation of proteins into multimeric complexes has been reported to correlate with  
125 longer half-lives in yeast (45) and mouse brain cells (46), these observations strengthen the  
126 link between TDP-43 functionality and its half-life.

### 28 **TDP-43 oligomerization and RNA-binding preserve its nuclear localization**

29 Due to an active nuclear import and its ability to passively diffuse out of the nucleus, TDP-  
30 43 is a nucleocytoplasmic shuttling protein (32, 47). RNA binding retains TDP-43 in the  
31 nucleus by forming bigger macromolecular complexes that slow down its diffusion (28, 32).  
32 We therefore wondered whether oligomerization is a greater driver of physiological TDP-  
33 43 nuclear localization. To address this question, we first measured the mean fluorescence

intensity of GFP-TDP-43 in the nucleus and the cytoplasm for all four GFP-TDP-43 variants. Using DNA and G3BP as nuclear and cytoplasmic markers, respectively (**Figure S2A**), we observed that monomeric TDP-43 (6M and 6M&RRMm) showed a significantly increased cytoplasmic localization compared to WT GFP-TDP-43 (**Figure 2A and S2A**). Mislocalization was exacerbated in combination with a loss of RNA binding, suggesting an independent, additive contribution of both protein-protein and protein-RNA interactions to the nuclear localization of TDP-43. Similar observations were obtained in human neurons transduced with HA-tagged versions of the TDP-43 variants (**Figures 2B-C**).

We subsequently sought to confirm these results by nucleocytoplasmic fractionation. In line with the immunocytochemistry results (**Figure 1C and 2A-C**), upon mild lysis and nuclei isolation by centrifugation, WT GFP-TDP-43 was mostly retained in the nuclear fraction (**Figure 2D-E**), with a small cytoplasmic pool corresponding to the subset of TDP-43 performing functions in this compartment (*1*). In contrast, oligomerization-deficient mutations (6M and 6M&RRMm) consistently shifted the majority of GFP-TDP-43 to the cytoplasmic fraction (**Figures 2D-E**), to a larger extent than observed by immunocytochemistry (**Figure 2A and 2C**). Importantly, the endogenous protein in the same samples remained predominantly nuclear (**Figure S2B**). This contrast was even more pronounced in the case of RRMm GFP-TDP-43, which fully shifted its localization to the cytoplasm upon fractionation (**Figures 2D-E**) as opposed to its nuclear localisation by immunocytochemistry (**Figure 2A and 2C**). We therefore wondered whether monomeric and RNA binding-deficient GFP-TDP-43 exhibit an increased passive diffusion rate and diffuse out of the nucleus during the fractionation procedure, when active nuclear import is absent. Indeed, stabilization of TDP-43 oligomers by protein-protein cross-linking with disuccinimidyl glutarate (DSG) (*15*) before nucleocytoplasmic fractionation increased the retention of endogenous TDP-43 in the nucleus (**Figure 2F-G**). Conversely, when we pretreated the cells with actinomycin D (ActD) to block transcription, the localization of endogenous TDP-43 shifted to the cytoplasm (**Figure 2F-G and S2C-D**), as previously reported (*28, 32*). Notably, this efflux of TDP-43 upon a decrease in nuclear RNA levels and subsequent sample fractionation (**Figure 2F-G**) was more pronounced than observed by immunocytochemistry (**Figure 2H-I**). These observations suggest that active nuclear import compensates for the abundant passive TDP-43 egress from the nucleus in the absence of oligomerization or RNA binding. Similar results were observed in human neurons, where the combined treatment of ActD and ivermectin, a nuclear import inhibitor, increased the cytoplasmic shift of endogenous TDP-43 as compared to treatment with ActD alone (**Figure 2J-K**). Collectively, these observations show that RNA binding and protein-protein interactions, especially its self-oligomerization, involve TDP-43 in larger macromolecular complexes that are retained in the nucleus.

## **Oligomerization is required for physiological phase separation of TDP-43 in the nucleus**

TDP-43 has been shown to undergo LLPS (*22*), a phenomenon visible in the nucleus as small droplets that fuse and split at endogenous protein concentrations (*23–26*). Such endogenous LLPS-driven droplets were also observed in our model (**Figure 3A**) as confirmed by treatment with 1,6-hexanediol (1,6-HD), an LLPS-suppressing alcohol (*48*). 1,6-HD decreased both the number and size of endogenous TDP-43 droplets (**Figure 3A-B and S3A**). Although high concentrations of the LCR of TDP-43 are sufficient for phase separation *in vitro* (*17, 49*), additional interactions must take place for full-length TDP-43 to undergo physiological LLPS at far lower concentrations (*24, 38*). Recent evidence points



82 towards self-interaction through the NTD as another driver of TDP-43 LLPS *in vitro* (37,  
83 38) and in human cells (34). Indeed, at a reported physiological concentration of 10  $\mu$ M (25,  
84 50) and using dextran as a crowding agent (25, 51) purified maltose binding protein (MBP)-  
85 tagged full-length TDP-43 phase separated into droplets, which also dissolved in the  
86 presence of 1,6-HD (**Figure 3C-D**). In contrast, oligomerization-deficient TDP-43 (6M) did  
87 not form droplets under the same conditions, suggesting that NTD interactions are essential  
88 for TDP-43 LLPS (**Figure 3C-D**).

89 These findings were reproduced in our isogenic cell lines. At comparable protein levels,  
90 oligomerization disruption virtually suppressed all GFP-TDP-43 droplet formation  
91 (**Figures 3E-F**), pointing to an essential role for oligomerization in physiological TDP-43  
92 LLPS in cells. Interestingly, RNA binding-deficient GFP-TDP-43 also formed nuclear  
93 droplets (**Figures 3E-F**), albeit smaller in size (**Figure S3B**). Since local protein  
94 concentration is a known driver of phase separation (22), the number of GFP-TDP-43  
95 droplets for both WT and RRMm was proportional to their nuclear protein levels (**Figure**  
96 **3F**). Disruption of both oligomerization and RNA binding in the combined GFP-TDP-43  
97 variant drastically reduced the number of nuclear droplets (**Figure 3E-F**), indicating that  
98 TDP-43 droplet formation in the absence of RNA binding is mediated through NTD-driven  
99 TDP-43 oligomerization. This was supported by biochemical analysis with DSG protein-  
100 protein crosslinking which showed protein complexes at the expected size of GFP-TDP-43  
101 dimers for both WT and RRMm, but not for the 6M-containing variants (**Figures 3G-H**  
102 **and S3C-D**). Similar to its WT counterpart, stabilization of these protein complexes via  
103 crosslinking retained GFP-TDP-43 RRMm predominantly in the nucleus in our isogenic  
104 cell lines despite the lack of RNA binding (**Figure S2C-D**). Overall, our results indicate  
105 that NTD-driven oligomerization –and not only LCR interactions– are essential for TDP-43  
106 LLPS in cells, both in the presence and absence of RNA.  
107

### 108 **Loss of RNA binding leads to conformationally distinct TDP-43 oligomers**

109 The observed GFP-TDP-43 dimers in the RRMm variant were significantly reduced  
110 compared to TDP-43 with retained RNA binding capability (**Figures 3G-H**), suggesting  
111 that TDP-43 oligomerization is modulated by RNA binding. Indeed, treatment with ActD  
112 decreased the level of endogenous TDP-43 dimers detected by protein-protein cross-linking  
113 (**Figure 4A-B**). Concomitant with this reduction in oligomerization, ActD-treated cells also  
114 displayed a reduced number of TDP-43 nuclear droplets (**Figure 4C-D**). To determine  
115 whether TDP-43 oligomerization is exclusively confined to nuclear droplets, we first  
116 assessed the exact subnuclear location of the oligomers. For this purpose, we employed  
117 proximity ligation assay (PLA) to visualize TDP-43 dimers with a single monoclonal  
118 antibody (mAb) conjugated to two different oligonucleotides. With this approach, only  
119 TDP-43 molecules that come to close proximity (maximum 20 nm apart) allow  
120 oligonucleotide hybridization and fluorescent signal amplification. Surprisingly, while  
121 abundant PLA signal was detected in the nucleus, only a fraction overlapped with its nuclear  
122 droplets, suggesting that TDP-43 dimerization is not restricted to nuclear droplets (**Figure**  
123 **4E**), a result that was confirmed for WT GFP-TDP-43 using a mAb against GFP (**Figure**  
124 **4F and S4A**).

125 In contrast, the oligomerization-deficient variants showed a markedly decreased PLA  
126 signal, even in cells with comparable protein levels, confirming that the observed PLA  
127 signal depends on oligomerization. In line with our DSG cross-linking results (**Figure 3G-**  
128 **H**), the RNA-binding GFP-TDP-43 mutant displayed a positive PLA signal (**Figure 4F**).

!29 Interestingly, the mean intensity of PLA-positive foci was consistently higher than that of  
!30 its WT counterpart (**Figure 4F**) at comparable protein levels (**Figure 4G**). These results  
!31 were confirmed using a mAAb targeting a different tag in the GFP-TDP-43 protein (**Figure**  
!32 **S4B**). We further validated this finding with an alternative approach using a GFP tripartite  
!33 fluorescence complementation (triFC) assay that measures physiological dimerization, as  
!34 we previously showed (31, 52) (**Figure S4C**). Co-transfection of T<sub>10</sub>- and T<sub>11</sub>-tagged TDP-  
!35 43 variants along with a nuclear-targeted GFP<sub>1-9</sub> in mouse motor neuron-like cells showed  
!36 positive GFP complementation signal for the WT protein, but none of the other variants  
!37 (**Figure 4H-I**), despite similar nuclear protein levels (**Figure S4D-E**). This suggests that  
!38 despite our biochemical (**Figures 3G-H**) and imaging (**Figures 4F-G and S4B**)  
!39 observations indicating that RNA binding-deficient TDP-43 dimerizes, these dimers do not  
!40 come in close enough contact and with the correct orientation to reconstitute GFP  
!41 fluorescence. This contrast to the WT protein supports the notion of a distinct conformation  
!42 of TDP-43 dimers in the absence of RNA. Of note, transient expression of the monomeric  
!43 GFP-TDP-43 variants in this cellular model also showed a noticeable cytoplasmic fraction  
!44 (**Figures 4H and S4F**), comparable to our observations in the isogenic cell lines and in  
!45 human neurons (**Figure 2B and C**). Overall, detection and quantification of dimeric TDP-  
!46 43 species by a combination of different imaging and biochemical methodologies supports  
!47 the view that RNA binding is required for the proper orientation of TDP-43 dimers and  
!48 likely oligomers.  
!49

### !50 **TDP-43 partitions in heterogenous nuclear bodies via oligomerization and RNA** !51 **binding**

!52 Since RNA promotes phase separation by providing a scaffold for many phase-separated  
!53 nuclear bodies (53, 54), we sought to determine whether all nuclear TDP-43 droplets were  
!54 of similar structure and composition. For this purpose, we determined the colocalization of  
!55 endogenous TDP-43 in HEK293 cells with a broad panel of nuclear membraneless  
!56 organelles (**Figure 5A**). This approach revealed that a fraction of TDP-43 droplets, in  
!57 particular the largest in size, were labeled with markers of Cajal bodies (**Figure 5A-B**), the  
!58 maturation compartments of spliceosomal small nuclear ribonucleoprotein particles.  
!59 Interestingly, TDP-43 was present in all Cajal bodies in HEK293 cells and neurons (**Figure**  
!60 **5C-D**), but Cajal bodies only comprised a small fraction of all TDP-43 droplets. Another  
!61 portion of TDP-43 was localized within paraspeckles, but, unlike Cajal bodies, not every  
!62 paraspeckle contained TDP-43. TDP-43 was absent from other RNA-nucleated  
!63 compartments such as nuclear speckles (54) and from protein-exclusive compartments like  
!64 promyelocytic leukemia (PML) bodies (**Figure 5A-B**) (55). In contrast to WT TDP-43,  
!65 RNA binding-deficient GFP-TDP-43 was incorporated into neither Cajal bodies nor  
!66 paraspeckles, in line with previous reports (27) (**Figure 5E-F and S5A-B**). Intriguingly,  
!67 also monomeric GFP-TDP-43 was largely absent from these nuclear compartments (**Figure**  
!68 **5E-F and S5A-B**), highlighting the requirement of TDP-43 oligomerization for its  
!69 incorporation within functional nuclear bodies. Collectively, these observations suggest that  
!70 at least a fraction of TDP-43 LLPS arises from an RNA scaffold, since TDP-43 has been  
!71 shown to bind small Cajal body-specific RNAs (56) and *NEATI*, the architectural RNA of  
!72 paraspeckles (20, 21, 53). The remaining, unidentified nuclear TDP-43 droplets, present in  
!73 both the WT and RNA binding-deficient variant (**Figure 5E-F and S5A-B**), might represent  
!74 a precursor pool for Cajal bodies and paraspeckles, an inert droplet population or even be  
!75 linked to yet undefined bodies and functions. Whether any of these potentially “RNAless”  
!76 TDP-43 nuclear compartments formed by the RNA binding-deficient variant are identical  
!77 to the unidentified droplets occurring in physiological conditions and/or have functional

roles remains unclear. Overall, the heterogeneous nature of nuclear TDP-43 droplets suggests that LLPS is required for a wide array of TDP-43 functions within the nucleus.

### **TDP-43 oligomerization is required for the transcriptome-wide splicing regulation of its RNA targets**

NTD-mediated oligomerization is required for splicing of at least a subset of the RNA targets of TDP-43 (15, 35–38), but given the broad role of TDP-43 in regulating splicing events (20, 21, 57, 58), the question remained whether oligomerization is essential for all its splicing targets. RNA-sequencing (RNA-seq) of our isogenic cell lines revealed that expression of the WT variant resulted in alternative splicing of >70 genes when compared to the expression of the GFP-TDP-43 RRMm, an established splicing-deficient protein version (16, 18), including previously reported events of exon inclusion/exclusion, intron retention and alternative polyadenylation site usage depending on TDP-43 binding (20, 21, 58) (Figures 6A and S6A). When the same comparison was performed between the oligomerization-deficient and the RRMm GFP-TDP-43, no significant alternatively spliced events were found (Figures 6A and S6A), suggesting a lack of splicing functionality of monomeric GFP-TDP-43, which was also observable at the differentially expressed RNA and protein levels (Figure S6B). A particularly interesting event modulated by TDP-43 binding is the splicing of an alternative intron (intron 7) in its own 3' UTR, which results in autoregulation of the TDP-43 mRNA and protein levels (20, 40, 59) (Figure S6C). Analysis of the 3' UTR of TDP-43 by RNA-seq and qPCR showed that, similar to other alternative splicing events, 6M GFP-TDP-43 cannot promote the exclusion of intron 7 in the endogenous *TARDBP* mRNA (Figure 6B and S6D-E), resulting in lack of autoregulation at the protein level (Figure 6C-D). This lack of splicing activity by monomeric TDP-43 was not due to its reduced protein concentration, since WT GFP-TDP-43 autoregulated endogenous TDP-43 at comparable expression levels (Figure S6D-E). Overall, our data support the requirement of TDP-43 oligomerization for its broad role in splicing regulation.

### **Cytoplasmic TDP-43 oligomerization is required for its incorporation into stress granules**

To understand whether oligomerization is also required for TDP-43 functions outside of the nucleus, we studied TDP-43 incorporation into SGs in the cytoplasm (29). Since relocation of TDP-43 into SGs depends on the cell type and the stressor applied (29), we resorted to the GFP triFC assay (Figure S2L) to investigate TDP-43 complementation in the well-established oxidative stress model in HeLa cells (29, 30) T<sub>10</sub>- and T<sub>11</sub>-tagged TDP-43 variants and incubation with recombinant GFP<sub>1-9</sub> revealed that, unlike the WT protein –but similarly to the RNA binding-deficient mutant–, monomeric TDP-43 did not incorporate into SGs (Figure 6G-H), suggesting that TDP-43 oligomerization also takes place in the cytoplasm. To confirm the presence of cytoplasmic TDP-43 oligomers in physiological conditions, we developed isogenic HEK293 Flp-In T-REx lines harboring one copy of each of the GFP-TDP-43 variants in combination with previously published mutations in the nuclear localization signal that abolish nuclear import (GFP-TDP-43 mutNLS) (60). Protein levels of the GFP-TDP-43 mutNLS variants were similar to that of their nuclear counterparts (Figure S6F and 1D). Interestingly, the localization of the GFP-TDP-43 mutNLS variants differed between the four cell lines. WT and RRMm GFP-TDP-43 mutNLS were predominantly present in the cytoplasm, whereas their monomeric counterparts significantly shifted their localization to the nucleus (Figure S6G-H). This

125 suggests that WT and RRMm GFP-TDP-43 mutNLS oligomerize in the cytoplasm, which  
126 hinders their passive diffusion back into the nucleus. To confirm this, we performed DSG  
127 cross-linking of protein-protein interactions in the GFP-TDP-43 mutNLS lines and found  
128 that both WT and RRMm GFP-TDP-43 mutNLS formed oligomers, albeit their presence  
129 was reduced in the RRMm variant (**Figure 6I-J**). Moreover, DSG cross-linking followed  
130 by nucleocytoplasmic fractionation enabled the detection of WT and RRM GFP-TDP-43  
131 oligomers in the cytoplasmic fraction (**Figure 6K**). Albeit less abundant than nuclear  
132 oligomerization, cytoplasmic oligomerization was also observed at endogenous TDP-43  
133 levels by PLA (**Figure 4E**). Altogether, our observations suggest that oligomerization is  
134 essential in both the nucleus and the cytoplasm for TDP-43 to perform its functions in RNA  
135 metabolism.  
136

### 137 **Loss of RNA binding or oligomerization differentially modulate the subcellular** 138 **localization of TDP-43 inclusions**

139 Decline of the cellular proteostasis capacity with age contributes to protein misfolding in  
140 neurodegenerative diseases (43), often resulting in the accumulation of ubiquitinated  
141 inclusions in affected tissues, including TDP-43 proteinopathies (2, 3). Since monomeric  
142 and RNA binding-deficient TDP-43 showed shorter half-lives at physiological levels  
143 (**Figure 1D-E**), we sought to determine how failure of the UPS machinery affects the  
144 accumulation of these species. By blocking the proteasome with the inhibitor MG132, we  
145 observed that both monomeric and RNA binding-deficient GFP-TDP-43 formed protein  
146 inclusions in the isogenic cell lines, in contrast to the WT counterpart, which remained  
147 largely diffuse (**Figure 7A-B and S7A**). The vast majority of aggregates formed by  
148 monomeric GFP-TDP-43 (6M and 6M&RRMm) localized to the cytoplasm, in line with  
149 previous results showing that high overexpression of oligomerization-deficient GFP-TDP-  
150 43 by transient transfection triggers cytoplasmic TDP-43 aggregation (15). Interestingly, in  
151 addition to cytoplasmic inclusions, MG132 treatment resulted in nuclear aggregation of  
152 RNA binding-deficient GFP-TDP-43 in >70% of the cells. The combined loss of  
153 oligomerization and RNA binding shifted the aggregation to the cytoplasm, suggesting that  
154 nuclear TDP-43 aggregation depended on NTD interactions. The observed TDP-43  
155 aggregation patterns were specific to the inhibition of the UPS degradation pathway, as  
156 several classes of proteasome inhibitors, but not an autophagy one, yielded similar outcomes  
157 in the isogenic cell lines (**Figure S7B-C**).

158 In human neurons, monomeric TDP-43-HA variants also predominantly aggregated in the  
159 cytoplasm, whereas RRMm TDP-43-HA additionally presented nuclear inclusions in >50%  
160 of transduced neurons (**Figure 7C-D**), thus reproducing the distinct TDP-43 aggregation  
161 patterns observed in isogenic cell lines. Upon MG132 treatment, WT TDP-43-HA also  
162 formed inclusions in neurons, both in the nucleus and cytoplasm, likely due to higher  
163 transgene protein levels in transduced neurons compared to the isogenic GFP-TDP-43 lines.  
164 Interestingly, and in line with higher protein levels, RRMm TDP-43-HA already formed  
165 nuclear inclusions in the absence of proteasome inhibition in a subset of transduced human  
166 neurons (**Figure S7D**). Taken together, our data show that loss of oligomerization shifts  
167 TDP-43 aggregate formation from the nucleus to the cytoplasm.

### 169 **TDP-43 aggregates in an LLPS- or an aggresome-dependent manner in the nucleus** 170 **and cytoplasm, respectively**



To understand the origin of cytoplasmic and nuclear TDP-43 inclusions, we performed live cell imaging of the GFP-TDP-43 isogenic lines during the treatment with the proteasome inhibitor. While WT GFP-TDP-43 droplets merely changed position, fused and split within the nucleus upon MG132 addition, monomeric GFP-TDP-43 formed a single cytoplasmic inclusion whose size increased over time, accompanied by gradual decrease in the diffused nuclear TDP-43 signal (**Figure 8A**) resembling the nuclear clearance that has been widely reported in neurons with TDP-43 pathology in ALS and FTLN patients (1–3). Fluorescence recovery after photobleaching (FRAP) experiments revealed that whereas WT GFP-TDP-43 remained diffuse throughout the treatment, cytoplasmic inclusions comprising monomeric TDP-43 were immobile structures, (**Figure 8B and S8A-B**). A similar aggregation pathway –a single focus expanding in size yielding one solid cytoplasmic inclusion– was also observed for the RRMm GFP-TDP-43 in the cytoplasm (**Figure S8C-D**), suggesting that the formation of cytoplasmic aggregates upon proteasomal failure does require neither oligomerization nor RNA binding. In contrast, in the nucleus, the elevated protein levels of RRMm GFP-TDP-43 caused by proteasome inhibition induced the formation of many initially dynamic droplets, which eventually fused to form a single solid inclusion (**Figure 8B-C**), reminiscent of the single intranuclear inclusions found in patients with specific FTLN subtypes (6, 61). FRAP analysis showed that GFP-TDP-43 RRMm in the final inclusion had lost its fluid behavior (**Figure 8B**). In a subset of cells, RRMm GFP-TDP-43 deposited in the nucleoli (**Figure S8C**), in line with the protein quality control properties of this phase-separated compartment (62). Importantly, also in human neurons the formation of nuclear aggregates in a subset of transduced cells expressing RRMm TDP-43-HA (**Figure S7B**) was accompanied by the pronounced presence of nuclear droplets in transduced cells without inclusion (**Figure S8F**). Together, these data suggest that TDP-43 aggregates via LLPS in the nucleus.

Cytoplasmic TDP-43 inclusions were consistently found adjacent to the nucleus, in a location occupied by the aggresome, a juxtannuclear accumulation of misfolded proteins resulting from saturation of the chaperone refolding system and/or the UPS degradation pathway (**Figure S8G**) which has been linked to the origin of protein aggregates in neurodegenerative diseases (63). Indeed, cytoplasmic inclusions, formed by 6M, RRMm or 6M&RRMm GFP-TDP-43, were surrounded by a vimentin cage, a characteristic feature of aggresomes (**Figure 8D and S8H**) (63). Additionally, cytoplasmic, but not nuclear, TDP-43 aggregates were positive for p62 (**Figure 8E**), a critical component of aggresomes (64) and a pathological aggregate marker in certain FTLN subtypes (6, 61). These observations suggest that distinct pathways towards TDP-43 aggregation are at play in the nucleus and cytoplasm and that monomerization increases TDP-43 incorporation in cytoplasmic aggresomes upon proteasomal failure, thereby potentially triggering cytoplasmic TDP-43 aggregation in disease.

## Discussion

In this study, we describe the interconnection between NTD-driven TDP-43 oligomerization and RNA binding, and show that they cooperatively retain TDP-43 in the nucleus, instruct its functionality and therefore slow down its turnover. We demonstrate that oligomerization is essential for the broad function of TDP-43 in splicing regulation and allows its LLPS-mediated incorporation into nuclear membraneless compartments, including Cajal bodies and paraspeckles. Our work describes for the first time that, under physiological conditions, TDP-43 oligomers exist in the cytoplasm, where they are required for LLPS-dependent incorporation into SGs. Moreover, we show that, in the absence of RNA binding, TDP-43

oligomerization is reduced, but the dimers that do form adopt a spatial conformation that is different from the RNA-bound oligomeric state. Importantly, our results shed light on the molecular mechanism of two distinct and independent pathways triggering TDP-43 aggregation, which highlight the importance of TDP-43 monomerization and/or loss of RNA binding as key early events in the development of TDP-43 proteinopathies (**Figure 9**).

TDP-43 oligomerization is a dynamic event that controls the relative amounts of TDP-43 monomers, dimers and oligomers in the cell. However, the specialized roles of the individual TDP-43 species in health and disease remained unknown. Expression of different TDP-43 variants at near-physiological levels in our human cell line and neural system revealed that, in comparison to its oligomeric counterpart, monomeric TDP-43 lacks functionality, becomes more prone to escape the nucleus –likely by passive diffusion (32, 47)– and is rapidly degraded. In the event of proteasomal failure, these otherwise short-lived TDP-43 monomers are deposited into aggresomes, whose expansion is accompanied by a progressive decrease in nuclear TDP-43. This cytoplasmic aggregation observed in our human cellular models recapitulates the key pathological TDP-43 features observed in affected neurons of patients with TDP-43 proteinopathies, namely its nuclear clearance, loss of function and cytoplasmic aggregation (2, 3). Interestingly, the aggresome pathway was previously linked to sporadic ALS/FTLD (65) through the disturbance of p62 (65, 66), a key player in aggresome formation (64). Furthermore, aggresome markers HDAC6 and p62 have been reported to colocalize with a subset of cytoplasmic TDP-43 aggregates in ALS/FTLD patients (6, 61, 67). When the conditions that favor the monomeric state of TDP-43 and hamper its proteasomal degradation persist, TDP-43 monomers contained in the aggresomes may resist clearance by autophagy and rather further mature into compact aggregates due to the high concentration of unfolded LCRs in the absence of NTD-driven organization that keeps them apart (15). Since monomeric TDP-43 is unable to autoregulate its own levels, the continued production of more TDP-43 to compensate for its loss of function will only exacerbate this pathological transition. Our data signifies that loss of TDP-43 oligomerization ignites a pathological cascade that culminates in the formation of cytoplasmic TDP-43 inclusions via the aggresome pathway.

In addition to loss of oligomerization, our data indicate that also the disturbance of TDP-43 oligomer conformation triggered by loss of RNA binding plays a role in pathology through a distinct molecular pathway in the nucleus. While previous studies have addressed the role of RNA in TDP-43 pathogenesis, our work provides insights into the molecular mechanism underlying the aberrant phase transition of NTD-driven RNAless TDP-43 oligomers into nuclear immobile inclusions. Using a combination of imaging and biochemical assays, we observed that TDP-43 oligomers present a different conformation in an RNA-bound or -unbound state. RNA-bound TDP-43 oligomers enact its physiological functions, maintain its localization and antagonize the formation of pathological aggregates (15 and this study), while RNAless TDP-43 oligomers, that may or may not have functional roles, undergo aberrant phase separation leading to nuclear aggregation (37 and this study). These observations clarify the apparently controversial role of the NTD in aggregate formation, which has been found both synergistic (35, 68–70) and antagonistic (15). Based on our observations, we propose that NTD-mediated TDP-43 self-interaction is a double-edged sword: in the presence of RNA, it is essential for TDP-43 to perform its functions and undergo physiological LLPS, while in the absence of RNA binding it promotes aberrant LLPS that leads to aggregation.

In addition to the cytoplasmic aggregation of TDP-43, neuronal intranuclear inclusions have been reported in two of the five recognized FTLD-TDP subtypes (2, 3, 6, 71–73) and are particularly abundant in FTLD cases linked to mutations in valosin-containing protein (VCP) (71, 72), which is involved in nuclear protein quality control degradation (74). In our human cellular models, we observed LLPS-driven intranuclear aggregation of RNA binding-deficient TDP-43 oligomers upon inhibition of proteasomal degradation. Similarly, nuclear inclusions have also been reported in previous studies employing strong overexpression of TDP-43 RNA binding mutants in cells and neurons (23, 33, 36, 42, 60). In addition to its LLPS-mediated nuclear aggregation, RNA binding-deficient TDP-43 formed cytoplasmic inclusions via the aggresome pathway. This route is likely favored by the increase of the monomeric state in the absence of RNA binding, accompanied by nuclear efflux, as previously shown upon proteasome inhibition in cultured neurons (75). Altogether, our data show that when a cell encounters proteostatic stress, TDP-43 takes different routes towards inclusion formation, and the selection of the pathway depends on both the protein state (monomeric versus RNAless) and the subcellular environment (cytoplasm versus nucleus). While our study provides evidence for the importance of two such routes (nuclear LLPS-dependent and cytoplasmic aggresome-mediated), additional aggregation pathways—for example, cytoplasmic LLPS-mediated (24, 33, 67)—likely exist and may be triggered under different circumstances and involve other TDP-43 states. Collectively these distinct pathways may account for the spectrum of cytoplasmic aggregates observed in patients with TDP-43 proteinopathies.

Why would the majority of TDP-43 aggregates reside in the cytoplasm in ALS/FTLD patients? Our data indicates that TDP-43 monomerization and its subsequent nuclear efflux is a more frequent or potent event than decreased RNA binding affinity in these cases. Alternatively, the high nuclear RNA concentrations that have been shown to prevent LLPS of RNA-binding proteins (50) may counteract aberrant LLPS and aggregation, even in the absence of specific RRM-RNA interactions for TDP-43. This balancing mechanism may be reinforced by the upregulation of some architectural TDP-43 RNA targets in the nucleus, including *NEATI* (26, 50). This binding could instruct the proper, RNA-loaded orientation of oligomers with a concomitant increase in physiological LLPS in the form of nuclear bodies. In fact, elevated *NEATI* levels and paraspeckle formation have been amply reported in TDP-43 proteinopathies (21, 26, 76, 77).

The cellular machinery that regulates TDP-43 oligomerization remains unknown. While protein concentration is a determinant of TDP-43 oligomerization (14, 15), the conditions that keep the balance between monomeric and oligomeric TDP-43 species in healthy cells and, most importantly, increase TDP-43 monomerization in disease require further investigation. Post-translational modifications (PTMs) are excellent candidates for such physiological regulation of TDP-43 oligomerization and a recent study identified a single serine phosphorylation event within the NTD interface that decreases oligomerization *in vitro* (38), albeit its effects within cells or occurrence in disease have not yet been tested. Similarly, specific acetylation events within the RRMs that lower the affinity of TDP-43 for RNA have been detected in ALS patients (78) and were subsequently reported to trigger nuclear TDP-43 aggregation via aberrant LLPS (34). Supporting the link between reduced RNA affinity and disease, ALS/FTD-associated mutations within the RRMs have been shown to disrupt RNA binding and enhance TDP-43 proteinopathy (79). Moreover, since ATP was recently shown to directly bind the NTD of TDP-43, thereby enhancing its oligomerization (44), the decrease in cellular ATP levels with age (80) could also act as a monomerization-inducing trigger. It is also conceivable that additional, yet unknown, protein interactors of TDP-43 may act as modifiers of oligomerization. Future work should

i15 focus on determining the molecular switches within TDP-43 and/or protein partners that  
i16 regulate its oligomerization and RNA binding and on validating the occurrence of  
i17 diminished TDP-43 oligomerization and RNA affinity in patient tissue. Such insights will  
i18 be valuable to inform drug design targeting TDP-43 oligomerization and RNA binding,  
i19 including dimer stabilization or recovery of RRM-RNA interactions, among others.

i20 In conclusion, oligomerization and RNA binding allow TDP-43 to maintain its localization  
i21 and function in physiology and their disruption drives distinct aggregation pathways in the  
i22 nucleus and cytoplasm, indicating that distinct molecular origins may account for the  
i23 plethora of TDP-43 aggregation types observed in ALS and FTL subtypes.  
i24

## i25 **Materials and Methods**

### i26 **Plasmids**

i27 The pcDNA5 plasmid containing the GFP-tagged human TDP-43 cDNA sequence was a  
i28 kind gift of Dr. Shuo-Chien Ling (41). The mutations to introduce a siRNA resistance in the  
i29 TDP-43 coding region without altering the amino acid sequence and the oligomerization-  
i30 disrupting mutations in the N-terminal domain were previously described (15). RNA-  
i31 binding disruption mutations were introduced by site-directed mutagenesis PCR as  
i32 described before (15), using high fidelity Phusion DNA Polymerase (New England Biolabs,  
i33 M0530) with primers detailed in **Table S1** followed by DpnI (New England Biolabs,  
i34 R0176) digestion before bacterial transformation and colony selection.

i35 Plasmids encoding T<sub>10</sub>- and T<sub>11</sub>-tagged TDP-43 and TDP-43 6M have already been reported  
i36 (15, 52). The sequence encoding TDP-43 RRMm was amplified by PCR from the pcDNA5  
i37 plasmids described above by adding BamHI/XhoI restriction sites using the primers detailed  
i38 in **Table S1**. Amplified products were cloned into the T<sub>10</sub> and T<sub>11</sub>pcDNA3 parental plasmids  
i39 (52) between BamHI and XhoI in order to obtain plasmids encoding T<sub>10</sub>-HA-TDP43 RRMm  
i40 and T<sub>11</sub>-β1-TDP-43 RRMm. The same amplified sequence was cloned into the plasmids  
i41 encoding T<sub>10</sub>- and T<sub>11</sub>-tagged TDP-43 6M (52) between EcoRI and XhoI in order to obtain  
i42 plasmids encoding for T<sub>10</sub>-HA-TDP43 6M&RRMm and T<sub>11</sub>-β1-TDP-43 6M&RRMm.

i43 TDP-43 with a C-terminal HA tag was directly amplified from the GFP-TDP-43 construct  
i44 described above and inserted into an autoregulatory all-in-one TetON cassette previously  
i45 inserted into pLVX backbone (81) by Gibson cloning using the NEBuilder HiFi DNA  
i46 Assembly Cloning Kit (New England Biolabs, E5520S) according to the manufacturer's  
i47 instructions.

i48 The plasmid encoding the His6-tagged RRMs of TDP-43 for bacterial protein expression  
i49 was previously published (16) and mutations disrupting RNA binding were introduced as  
i50 described above. The plasmid encoding TDP-43-MBP-His6 for bacterial protein expression  
i51 was a gift from Nicolas Fawzi (Addgene plasmid #104480; <http://n2t.net/addgene:104480>;  
i52 RRID:Addgene\_104480) (38). Point mutations for 6M, S2C, C39S and C50S were  
i53 introduced with site-directed mutagenesis PCR with high fidelity Phusion DNA Polymerase  
i54 (New England Biolabs, M0530) using primers described in **Table S1**. The plasmid encoding  
i55 the MBP-His6 was generated using deletion cloning by PCR with high fidelity Phusion  
i56 DNA Polymerase (New England Biolabs, M0530) using designed primers described in  
i57 **Table S1**.

### i58 **Recombinant protein expression and purification**



i59 Production of TDP-43 RRM for NMR studies was performed as previously described (16).  
i60 Production of full-length TDP-43 was performed as previously reported (7). For more  
i61 details, see **Supplementary materials & methods**. The MBP-His6 was purified as the full-  
i62 length TDP-43 but as purity was reached after the Ni Sepharose Excel material the protein  
i63 was subsequently dialysed against a storage buffer (20 mM Tris pH 8.0, 300 mM NaCl, 1  
i64 mM TCEP) overnight at 4°C, concentrated the next day using Amicon Ultra-15  
i65 concentrators MWCO 10 kDa (Merck Millipore, UFC901024), flash frozen and kept at -80  
i66 °C.

### i67 **Circular dichroism experiments**

i68 TDP-43-MBP constructs were thawed on ice and centrifuged for 15 min at 17 100 g and  
i69 4°C. The buffer was exchanged to 10 mM sodium phosphate pH 7.4 (0.036 % (w/v) sodium  
i70 phosphate monobasic (Sigma Aldrich, S3139), 0.2 % (w/v) sodium phosphate dibasic  
i71 (Sigma Aldrich, S5136)) using 500 µl concentrators with a MWCO of 10 kDa (Merck  
i72 Millipore, UFC501024) 5 x (11 000 g, 10 min, 4°C). To ensure the solubility of the isolated  
i73 protein, the concentrate was again centrifuged as described above. Protein concentration  
i74 was determined by the extinction coefficients and molecular weights of the constructs  
i75 (ExPASy ProtParam software) and absorbance at 280 nm (NanoDrop, Thermo Scientific).  
i76 CD spectra of 200 µg/ml recombinant protein were recorded at 20 °C from 180-250 nm  
i77 with a bandwidth of 1 nm and a sampling period of 25 s on a Chirascan V100 (Applied  
i78 Photophysics). Ellipticity (in mdeg) was transformed to molar ellipticity (in deg cm<sup>2</sup> dmol<sup>-1</sup>)  
i79 with the following formula, where c (in M) is the concentration and L (in cm) represents  
i80 the pathlength of the cuvette:

$$i81 [\theta] = \frac{\theta}{10 \times c \times L}$$

### i82 **Phase separation experiments**

i83 Pure concentrated fractions of recombinant protein MBP-tagged full-length WT and 6M  
i84 TDP-43 were desalted in a buffer of 20 mM sodium phosphate pH 7.2 (0.072 % (w/v)  
i85 sodium phosphate monobasic, 0.4 % (w/v) sodium phosphate dibasic), 300 mM NaCl,  
i86 0.001% (v/v) TWEEN 20, 50 mM L-arginine (Merck Millipore, A5006), 50 mM L-glutamic  
i87 acid (Merck Millipore, G1251) on a HiTrap desalting column (Cytavia, 17140801). An  
i88 equimolar fluorophore labeling reaction was set up with CF660R maleimide (Biotum Inc.,  
i89 Fremont, CA) previously dissolved in dimethylformamide (DMF) in an N2-hood and  
i90 incubated for 16 h at 4°C under constant rotation. Reaction was stopped with 10 mM DTT  
i91 and subsequently passed through a HiLoad 10/300 Superdex 200 pg SEC (Cytiva,  
i92 28990944) in SEC buffer on an Äkta pure system (Cytavia). Labelling position was  
i93 confirmed by mass spectrometry and labelling ratio was determined by first determining the  
i94 correct protein concentration:

$$i95 \text{ Protein concentration (M)} = \frac{A_{280} - (A_{\text{max CF660R}} \times \text{CF})}{\epsilon}$$

i96 where  $A_{280}$  is the absorbance of the protein at 280 nm,  $A_{\text{max CF660R}}$  is the CF660R dye  
i97 absorbance at 663 nm (absorbance maximum of CF660R), CF is the correction factor for  
i98 the amount of absorbance at  $A_{280}$  caused by the dye and  $\epsilon$  is the protein molar extinction  
i99 coefficient.

i00 The labelling ratio was subsequently calculated with following formula:

$$\text{Dye/protein ratio} = \frac{A_{\text{max CF660R}}}{\epsilon' \times \text{protein concentration (M)}}$$

where,  $\epsilon'$  is the molar extinction coefficient of the CF660R fluorescent dye.

Correctly labelled protein with a labeling efficiency of >75% was snap frozen and stored at -20°C. TDP-43-MBP constructs were thawed and centrifuged (17100 g, 15 min, 4°C) before exchanging the buffer to a phase separation buffer consisting of 20 mM HEPES pH 7.4 (Biosolve, 0008042359BS), 150 mM NaCl, 1 mM TCEP. The samples were centrifuged 5 x (11 000 g, 10 min, 4°C) and protein concentration determined as described above. Phase separation of 10  $\mu$ M TDP-43-MBP containing CF660R-labelled TDP-43-MBP at a ratio of 1/200 was induced using dextran (Sigma, D8906) at a final concentration of 10% (w/v) in phase separation buffer and incubation for 2 h at 22°C in  $\mu$ -Slide Angiogenesis glass-bottom coverslips (ibidi, 81507). Images were acquired on a fluorescence microscope (Nanoimager S, ONI) with an Olympus 100x objective (1.4 NA) using a wavelength of 640 nm and 13% laser power. Reversibility was tested by adding 1,6-hexanediol (Sigma, 240117) to a final concentration of 8% (w/v) in phase separation buffer for 10 min at 22°C and subsequent imaging. Image analysis and droplet counts were performed with ImageJ (1.52k).

## Cell culture

All cells were cultured at 37°C with saturated humidity and an atmosphere of 5% CO<sub>2</sub>. HeLa cells were cultured in DMEM (Gibco, 61965-059) supplemented with 1% non-essential amino acids (Gibco, 11140035) and 10% fetal bovine serum (FBS; Gibco, 10270-106).

Mouse motor neuron-like hybrid cells NSC-34 (Bioconcept, CLU140) were proliferated on Matrigel (Corning, 354234)-coated dishes in Dulbecco's modified Eagle medium (DMEM; Sigma, D5671) supplemented with 10% FBS, 1X GlutaMAX (Gibco, 35050-061), 100 U/ml penicillin and 100  $\mu$ g/ml streptomycin (Gibco, 15140-122). For experiments, differentiation was induced by switching DMEM/F12 medium (Gibco, 21331-020) supplemented with 1X GlutaMAX, 1X B27+ supplement (Gibco, 17504-044), 1X N2 supplement (Gibco, 17502-048), 100 U/ml penicillin and 100  $\mu$ g/ml streptomycin.

HEK293 Flp-In T-REx stable lines were cultured in DMEM (Sigma, D5671) supplemented with 10% FBS, 1X GlutaMAX, 15  $\mu$ g/ml blasticidin S (Gibco, R21001; Invivogen, ant-bl-10p), 100  $\mu$ g/ml hygromycin B (Gibco, 10687010), 100 U/ml penicillin and 100  $\mu$ g/ml streptomycin. For details regarding live development, see **Supplementary materials and methods**. When required, cells were treated with the appropriate chemicals at the following concentrations: 1  $\mu$ g/ml doxycycline (Clontech, 631311), 2.5  $\mu$ M MG132 (APExBIO, A2585), 1.25  $\mu$ M MLN9708 (Selleck Chemicals, S2181), 500 nM bortezomib (BTZ; APExBIO, A2614), 100 nM bafilomycin A1 (Sigma-Aldrich, SML1661), 100  $\mu$ g/ml cycloheximide (Sigma-Aldrich, C4859), 5  $\mu$ g/ml actinomycin D (Sigma-Aldrich, A1410), 10% 1,6-hexanediol, 1mM sodium arsenite (Sigma-Aldrich, 35000-1L-R), dimethyl sulfoxide (DMSO; Sigma-Aldrich, D2650).

Human neural networks were differentiated from an in-house-developed iPSC-derived self-renewing human neural stem cell line (iCoMoNSCs) obtained from control human skin fibroblast, as described previously (81). For details regarding the culture and differentiation, see **Supplementary materials and methods**. When required, neural cultures were treated with the appropriate chemicals at the following concentrations: 1  $\mu$ g/mL doxycycline, 10  $\mu$ M MG132, 10  $\mu$ g/ml actinomycin D, 25  $\mu$ M ivermectin (Sigma-Aldrich, I8898).

## Lentiviral vector production

TDP-43-HA variants were packaged into lentivirus, harvested and concentrated as described previously (81). Lentiviral pellets were resuspended in neural maturation medium (containing all supplements but forskolin and cAMP, see **Supplementary materials and methods**), achieving 10x concentrated preparations of which the lentiviral titer was determined using Lenti-X GoStix Plus (Takara, 631280). Lentiviral preparations were aliquoted and stored at -80°C until use.

## Quantitative PCR (qPCR)

HEK stable lines were plated at a density of  $3 \times 10^5$  cells/well in a 6-well plate (TPP, 92406). Expression of GFP-TDP-43 was induced with 1 µg/ml doxycycline after 24 hours and cells were harvested 48 h later. Total RNA from cells in a single well of a 6-well plate was isolated using the RNeasy Plus Mini Kit (Qiagen, 74134) according to the manufacturer's instructions. Complementary DNA (cDNA) corresponding to 1 µg was generated using oligo(dT)20 primers and the SuperScript™ III First-Strand Synthesis SuperMix (Invitrogen, 18080400) according to the manufacturer's instructions. A qPCR of 50 cycles was performed with 10 ng of cDNA and 6.6 pmol of each of the primers (**Table S2**) per reaction using Fast SYBR™ Green Master Mix (Applied Biosystems, 4385612) in a AriaMx Real-Time PCR System (Agilent, G8830A). Relative fold gene expression was calculated with the  $2^{-\Delta\Delta Ct}$  method.

## GFP complementation assay

Tripartite GFP complementation experiments were performed as described before (15, 52). For more details, see **Supplementary materials and methods**.

## Protein-protein cross-linking in cells

Native protein-protein interactions were stabilized by crosslinking with disuccinimidyl glutarate (DSG; Thermo Scientific, 20593 or A35392) as previously reported (15). In brief, cells grown to 80% confluency in 6-well or 10 cm plates were washed once in cell culture-grade PBS (Gibco, 10010-015), scrapped in ice-cold cell culture-grade PBS and collected at 300 g and 4°C for 5 min in a 1.5 ml microfuge tube. Cells were resuspended in 100/600 µl ice-cold cell culture-grade PBS containing protease inhibitors and a freshly prepared 20 mM or 100 mM DSG solution in DMSO was added to the suspension to a final concentration of 1 mM. After incubation at 25 °C and 1500 rpm for 30 min in a Thermomixer (Eppendorf, 2230000048), the reaction was quenched by addition of Tris base to a final concentration of 20 mM and further incubation for 15 min. Cells were collected by centrifugation at 300 g for 5 min.

## Nucleocytoplasmic fractionation of cells

Nucleocytoplasmic fractionation of the GFP-TDP-43 (mutNLS) isogenic HEK293 lines was performed following a previously published protocol (82) with the following changes. Cells in 10-cm dishes at 80-90% confluency were scrapped in 1 ml cell culture-grade PBS, collected by centrifugation at 300 g for 5 min and resuspended in 880 µl. The final pellet fraction containing the isolated nuclei was resuspended in 380 µl of 1X Laemmli buffer and 1X reducing agent (Invitrogen, B0009) in cell culture-grade PBS supplemented with protease inhibitors, and 10 µl of each three of the final fractions were loaded onto the polyacrylamide gel for western blot analysis.

## Immunochemistry

For immunochemistry experiments, cell lines were plated onto poly-D-lysine (Sigma-Aldrich, P6407)-coated 96- or 24-well plates (Greiner Bio-One, 655090; ibidi, 82426) or 8-well glass chambers (ibidi, 80827). Unless stated otherwise, cell line cultures were fixed in 4% methanol-free formaldehyde (Thermo Scientific, 28908) in warm medium for 15 min, washed with cell culture-grade PBS, permeabilized and blocked in 10% donkey serum (Sigma-Aldrich, S30-M) and 0.1% Triton X-100 in cell culture-grade PBS for 10 min at RT. Neural cultures were plated onto Matrigel-coated 96-well plates (135 000 cells/well) or 8-well glass-bottom chambers (between 240 000 and 425 000 cells/well). Neural cultures were fixed in 4% methanol-free formaldehyde in cell culture-grade PBS for 25 min, washed with cell culture-grade PBS, permeabilized in 0.5% Triton X-100 in cell culture-grade PBS for 5 min and blocked in 10% donkey serum and 0.1% Triton X-100 in cell culture-grade PBS for 30 min at RT. Primary antibodies (**Table S3**) were diluted in the same buffer and incubated with the samples overnight at 4°C. After three washes with cell culture-grade PBS, Alexa Fluor-conjugated donkey secondary antibodies (**Table S3**) were incubated for 1h at RT and subsequently further washed with cell culture-grade PBS. Nuclei were counterstained with 1 µg/ml DAPI (Thermo Scientific, 62248) and samples imaged in cell culture-grade PBS.

## Proximity ligation assay (PLA)

Cell lines plated on 96-well plates were fixed in pure ice-cold methanol for 7 minutes at -20°C, followed by three cell culture-grade PBS washes. PLA assay was performed using custom labelled antibodies and the Duolink In Situ Detection Reagents Red (Sigma-Aldrich, DUO92008) as described by the manufacturer but with slight modifications. In brief, antibodies of choice (anti-GFP and anti-HA in **Table S3**) in a carrier-free buffer were labelled with MINUS and PLUS probes using the Duolink In Situ Probemaker MINUS (Sigma-Aldrich, DUO92010) and Duolink In Situ Probemaker PLUS (Sigma-Aldrich, DUO92009) according to the manufacturer's instructions. Cells grown in 96-well plates were fixed in pure ice-cold methanol for 7.5 min at -20°C, followed by two washes with cell culture-grade PBS. After blocking for at least 15 min with blocking solution at room temperature, probe-conjugate antibodies were incubated overnight at 4°C. After two washes of 5 minutes each with buffer A (10 M Tris, 150 mM NaCl 0.05% Tween 20), ligation reaction was performed as indicated by the manufacturer. After an additional two washes of 5 min each with buffer A, amplification reaction was performed as indicated by the manufacturer. The reaction was quenched with buffer B (100 mM Tris, 100 mM NaCl). If required, secondary antibodies were incubated in cell culture-grade PBS overnight at 4°C, followed by DAPI counterstaining and imaging in cell culture-grade PBS.

## Fluorescence in situ hybridization (FISH)

FISH assay was performed using target probes for NEAT1 (Invitrogen, VX-01) and the View RNA Cell Plus Assay (Invitrogen, 88-19000) according to the manufacturer's instructions with slight modifications. HEK stable lines were plated at a density of 10 x 10<sup>4</sup> cells/well onto poly-D-lysine-coated 96-well plates. After 24 h, expression of GFP-TDP-43 was induced and, after further 48 h, cells were fixed in ViewRNA Cell Plus Fixation/Permeabilization Solution for 30 min at room temperature. After five washes with 1x PBS with RNase Inhibitor, ViewRNA Cell Plus Probe Solution containing the target probes was incubated for 2 h at 40°C. Following, the cells were washed with ViewRNA Cell Plus Wash Buffer Solution and Signal amplification was continued as indicated by the



'34 manufacturer. Nuclei were counterstained with DAPI and samples were imaged in cell  
'35 culture-grade PBS.

## '36 References

- '37 1. S. C. Ling, M. Polymenidou, D. W. Cleveland, Converging mechanisms in ALS and FTD:  
'38 disrupted RNA and protein homeostasis. *Neuron*. **79**, 416–438 (2013).
- '39 2. T. Arai, M. Hasegawa, H. Akiyama, K. Ikeda, T. Nonaka, H. Mori, D. Mann, K. Tsuchiya,  
'40 M. Yoshida, Y. Hashizume, T. Oda, TDP-43 is a component of ubiquitin-positive tau-  
'41 negative inclusions in frontotemporal lobar degeneration and amyotrophic lateral sclerosis.  
'42 *Biochem Biophys Res Commun*. **351**, 602–611 (2006).
- '43 3. M. Neumann, D. M. Sampathu, L. K. Kwong, A. C. Truax, M. C. Micsenyi, T. T. Chou, J.  
'44 Bruce, T. Schuck, M. Grossman, C. M. Clark, L. F. McCluskey, B. L. Miller, E. Masliah, I.  
'45 R. Mackenzie, H. Feldman, W. Feiden, H. A. Kretzschmar, J. Q. Trojanowski, V. M. Lee,  
'46 Ubiquitinated TDP-43 in frontotemporal lobar degeneration and amyotrophic lateral  
'47 sclerosis. *Science*. **314**, 130–133 (2006).
- '48 4. P. T. Nelson, D. W. Dickson, J. Q. Trojanowski, C. R. Jack, P. A. Boyle, K. Arfanakis, R.  
'49 Rademakers, I. Alafuzoff, J. Attems, C. Brayne, I. T. S. Coyle-Gilchrist, H. C. Chui, D. W.  
'50 Fardo, M. E. Flanagan, G. Halliday, S. R. K. Hokkanen, S. Hunter, G. A. Jicha, Y.  
'51 Katsumata, C. H. Kawas, C. D. Keene, G. G. Kovacs, W. A. Kukull, A. I. Levey, N.  
'52 Makkinejad, T. J. Montine, S. Murayama, M. E. Murray, S. Nag, R. A. Rissman, W. W.  
'53 Seeley, R. A. Sperling, C. L. White Iii, L. Yu, J. A. Schneider, Limbic-predominant age-  
'54 related TDP-43 encephalopathy (LATE): consensus working group report. *Brain*. **142**,  
'55 1503–1527 (2019).
- '56 5. A. S. Chen-Plotkin, V. M. Lee, J. Q. Trojanowski, TAR DNA-binding protein 43 in  
'57 neurodegenerative disease. *Nat Rev Neurol*. **6**, 211–220 (2010).
- '58 6. E. B. Lee, S. Porta, G. Michael Baer, Y. Xu, E. R. Suh, L. K. Kwong, L. Elman, M.  
'59 Grossman, V. M. Y. Lee, D. J. Irwin, V. M. Van Deerlin, J. Q. Trojanowski, Expansion of  
'60 the classification of FTLTDP: distinct pathology associated with rapidly progressive  
'61 frontotemporal degeneration. *Acta Neuropathol*. **134**, 65–78 (2017).
- '62 7. P. De Rossi, A. J. Lewis, J. Furrer, L. De Vos, T. Demeter, A. Zbinden, W. Zhong, V. I.  
'63 Wiersma, C. Scialo, J. Weber, Z. Guo, S. Scaramuzza, M. Di Fabrizio, C. Böing, D.  
'64 Castaño-Diez, A. Al-Amoudi, M. Pérez-Berlanga, T. Lashley, H. Stahlberg, M.  
'65 Polymenidou, FTLTDP assemblies seed neoaggregates with subtype-specific features  
'66 via a prion-like cascade. *EMBO Rep*. **22**, e53877 (2021).
- '67 8. H. Tsuji, T. Arai, F. Kametani, T. Nonaka, M. Yamashita, M. Suzukake, M. Hosokawa, M.  
'68 Yoshida, H. Hatsuta, M. Takao, Y. Saito, S. Murayama, H. Akiyama, M. Hasegawa, D. M.  
'69 Mann, A. Tamaoka, Molecular analysis and biochemical classification of TDP-43  
'70 proteinopathy. *Brain*. **135**, 3380–3391 (2012).
- '71 9. F. Laferriere, Z. Maniecka, M. Perez-Berlanga, M. Hruska-Plochan, L. Gilhespy, E. M.  
'72 Hock, U. Wagner, T. Afroz, P. J. Boersema, G. Barnettler, S. C. Foti, Y. T. Asi, A. M.  
'73 Isaacs, A. Al-Amoudi, A. Lewis, H. Stahlberg, J. Ravits, F. De Giorgi, F. Ichas, E. Bezard,  
'74 P. Picotti, T. Lashley, M. Polymenidou, TDP-43 extracted from frontotemporal lobar  
'75 degeneration subject brains displays distinct aggregate assemblies and neurotoxic effects  
'76 reflecting disease progression rates. *Nat Neurosci*. **22**, 65–77 (2019).

- '77 10. M. Neumann, P. Frick, F. Paron, J. Kosten, E. Buratti, I. R. Mackenzie, Antibody against  
'78 TDP-43 phosphorylated at serine 375 suggests conformational differences of TDP-43  
'79 aggregates among FTLD-TDP subtypes. *Acta Neuropathol.* **140**, 645–658 (2020).
- '80 11. S. H. Ou, F. Wu, D. Harrich, L. F. Garcia-Martinez, R. B. Gaynor, Cloning and  
'81 characterization of a novel cellular protein, TDP-43, that binds to human  
'82 immunodeficiency virus type 1 TAR DNA sequence motifs. *J Virol.* **69**, 3584–3596  
'83 (1995).
- '84 12. M. J. Winton, L. M. Igaz, M. M. Wong, L. K. Kwong, J. Q. Trojanowski, V. M. Lee,  
'85 Disturbance of nuclear and cytoplasmic TAR DNA-binding protein (TDP-43) induces  
'86 disease-like redistribution, sequestration, and aggregate formation. *J Biol Chem.* **283**,  
'87 13302–13309 (2008).
- '88 13. E. Buratti, F. E. Baralle, Characterization and Functional Implications of the RNA Binding  
'89 Properties of Nuclear Factor TDP-43, a Novel Splicing Regulator of CFTR Exon 9. *J. Biol.*  
'90 *Chem.* **276**, 36337–36343 (2001).
- '91 14. C. K. Chang, T. H. Wu, C. Y. Wu, M. H. Chiang, E. K. Toh, Y. C. Hsu, K. F. Lin, Y. H.  
'92 Liao, T. H. Huang, J. J. Huang, The N-terminus of TDP-43 promotes its oligomerization  
'93 and enhances DNA binding affinity. *Biochem Biophys Res Commun.* **425**, 219–224 (2012).
- '94 15. T. Afroz, E. M. Hock, P. Ernst, C. Foglieni, M. Jambeau, L. A. B. Gilhespy, F. Laferriere,  
'95 Z. Maniecka, A. Pluckthun, P. Mittl, P. Paganetti, F. H. T. Allain, M. Polymenidou,  
'96 Functional and dynamic polymerization of the ALS-linked protein TDP-43 antagonizes its  
'97 pathologic aggregation. *Nat Commun.* **8**, 45 (2017).
- '98 16. P. J. Lukavsky, D. Daujotyte, J. R. Tollervey, J. Ule, C. Stuani, E. Buratti, F. E. Baralle, F.  
'99 F. Damberger, F. H. Allain, Molecular basis of UG-rich RNA recognition by the human  
'00 splicing factor TDP-43. *Nat Struct Mol Biol.* **20**, 1443–1449 (2013).
- '01 17. A. E. Conicella, G. H. Zerze, J. Mittal, N. L. Fawzi, ALS Mutations Disrupt Phase  
'02 Separation Mediated by alpha-Helical Structure in the TDP-43 Low-Complexity C-  
'03 Terminal Domain. *Structure.* **24**, 1537–1549 (2016).
- '04 18. A. D'Ambrogio, E. Buratti, C. Stuani, C. Guarnaccia, M. Romano, Y. M. Ayala, F. E.  
'05 Baralle, Functional mapping of the interaction between TDP-43 and hnRNP A2 in vivo.  
'06 *Nucleic Acids Res.* **37**, 4116–4126 (2009).
- '07 19. D. Arseni, M. Hasegawa, A. G. Murzin, F. Kametani, M. Arai, M. Yoshida, B. Ryskeldi-  
'08 Falcon, Structure of pathological TDP-43 filaments from ALS with FTLD. *Nature.* **601**,  
'09 139–143 (2022).
- '10 20. M. Polymenidou, C. Lagier-Tourenne, K. R. Hutt, S. C. Huelga, J. Moran, T. Y. Liang, S.  
'11 C. Ling, E. Sun, E. Wancewicz, C. Mazur, H. Kordasiewicz, Y. Sedaghat, J. P. Donohue,  
'12 L. Shiue, C. F. Bennett, G. W. Yeo, D. W. Cleveland, Long pre-mRNA depletion and RNA  
'13 missplicing contribute to neuronal vulnerability from loss of TDP-43. *Nat Neurosci.* **14**,  
'14 459–468 (2011).
- '15 21. J. R. Tollervey, T. Curk, B. Rogelj, M. Briese, M. Cereda, M. Kayikci, J. Konig, T.  
'16 Hortobagyi, A. L. Nishimura, V. Zupunski, R. Patani, S. Chandran, G. Rot, B. Zupan, C. E.  
'17 Shaw, J. Ule, Characterizing the RNA targets and position-dependent splicing regulation  
'18 by TDP-43. *Nat Neurosci.* **14**, 452–458 (2011).

- 19 22. A. Zbinden, M. Pérez-Berlanga, P. De Rossi, M. Polymenidou, Phase Separation and  
20 Neurodegenerative Diseases: A Disturbance in the Force. *Dev. Cell.* **55**, 45–68 (2020).
- 21 23. I. F. Wang, H. Y. Chang, S. C. Hou, G. G. Liou, T. D. Way, C. K. James Shen, The self-  
22 interaction of native TDP-43 C terminus inhibits its degradation and contributes to early  
23 proteinopathies. *Nat Commun.* **3**, 766 (2012).
- 24 24. F. Gasset-Rosa, S. Lu, H. Yu, C. Chen, Z. Melamed, L. Guo, J. Shorter, S. Da Cruz, D. W.  
25 Cleveland, Cytoplasmic TDP-43 De-mixing Independent of Stress Granules Drives  
26 Inhibition of Nuclear Import, Loss of Nuclear TDP-43, and Cell Death. *Neuron.* **102**, 339-  
27 357.e7 (2019).
- 28 25. M. Hallegger, A. M. Chakrabarti, F. C. Y. Lee, B. L. Lee, A. G. Amalietti, H. M. Odeh, K.  
29 E. Copley, J. D. Rubien, B. Portz, K. Kuret, I. Huppertz, F. Rau, R. Patani, N. L. Fawzi, J.  
30 Shorter, N. M. Luscombe, J. Ule, TDP-43 condensation properties specify its RNA-binding  
31 and regulatory repertoire. *Cell.* **184**, 4680-4696.e22 (2021).
- 32 26. C. Wang, Y. Duan, G. Duan, Q. Wang, K. Zhang, X. Deng, B. Qian, J. Gu, Z. Ma, S.  
33 Zhang, L. Guo, C. Liu, Y. Fang, Stress Induces Dynamic, Cytotoxicity-Antagonizing TDP-  
34 43 Nuclear Bodies via Paraspeckle LncRNA NEAT1-Mediated Liquid-Liquid Phase  
35 Separation. *Mol. Cell.* **79**, 443-458.e7 (2020).
- 36 27. H. Tsuiji, Y. Iguchi, A. Furuya, A. Kataoka, H. Hatsuta, N. Atsuta, F. Tanaka, Y.  
37 Hashizume, H. Akatsu, S. Murayama, G. Sobue, K. Yamanaka, Spliceosome integrity is  
38 defective in the motor neuron diseases ALS and SMA. *EMBO Mol. Med.* **5**, 221–234  
39 (2013).
- 40 28. Y. M. Ayala, P. Zago, A. D’Ambrogio, Y. F. Xu, L. Petrucelli, E. Buratti, F. E. Baralle,  
41 Structural determinants of the cellular localization and shuttling of TDP-43. *J Cell Sci.* **121**,  
42 3778–3785 (2008).
- 43 29. C. M. Dewey, B. Cenik, C. F. Sephton, B. A. Johnson, J. Herz, G. Yu, TDP-43 aggregation  
44 in neurodegeneration: are stress granules the key? *Brain Res.* **1462**, 16–25 (2012).
- 45 30. A. Aulas, S. Stabile, C. Vande Velde, Endogenous TDP-43, but not FUS, contributes to  
46 stress granule assembly via G3BP. *Mol. Neurodegener.* **7**, 54 (2012).
- 47 31. T. Afroz, M. Pérez-Berlanga, M. Polymenidou, Structural transition, function and  
48 dysfunction of TDP-43 in neurodegenerative diseases. *Chimia (Aarau).* **73**, 380–390  
49 (2019).
- 50 32. H. Ederle, C. Funk, C. Abou-Ajram, S. Hutten, E. B. E. Funk, R. H. Kehlenbach, S. M.  
51 Bailer, D. Dormann, Nuclear egress of TDP-43 and FUS occurs independently of Exportin-  
52 1/CRM1. *Sci Rep.* **8**, 7084 (2018).
- 53 33. J. R. Mann, A. M. Gleixner, J. C. Mauna, E. Gomes, M. R. DeChellis-Marks, P. G.  
54 Needham, K. E. Copley, B. Hurtle, B. Portz, N. J. Pyles, L. Guo, C. B. Calder, Z. P. Wills,  
55 U. B. Pandey, J. K. Kofler, J. L. Brodsky, A. Thathiah, J. Shorter, C. J. Donnelly, RNA  
56 Binding Antagonizes Neurotoxic Phase Transitions of TDP-43. *Neuron.* **102**, 321-338.e8  
57 (2019).
- 58 34. Y. Haiyang, L. Shan, G. Kelsey, S. Digvijay, V.-S. Sonia, T. Olga, T. Divek, B. M. S., Y.  
59 J. R., D. C. Sandrine, N. J. M., L. Miguel, G. A. S., V. Elizabeth, C. D. W., HSP70  
60 chaperones RNA-free TDP-43 into anisotropic intranuclear liquid spherical shells. *Science.*

361 **371**, eabb4309 (2021).

362 35. Y. J. Zhang, T. Caulfield, Y. F. Xu, T. F. Gendron, J. Hubbard, C. Stetler, H. Sasaguri, E.  
363 C. Whitelaw, S. Cai, W. C. Lee, L. Petrucelli, The dual functions of the extreme N-  
364 terminus of TDP-43 in regulating its biological activity and inclusion formation. *Hum Mol*  
365 *Genet.* **22**, 3112–3122 (2013).

366 36. M. Mompean, V. Romano, D. Pantoja-Uceda, C. Stuani, F. E. Baralle, E. Buratti, D. V  
367 Laurents, Point mutations in the N-terminal domain of transactive response DNA-binding  
368 protein 43 kDa (TDP-43) compromise its stability, dimerization, and functions. *J Biol*  
369 *Chem.* **292**, 11992–12006 (2017).

370 37. L.-L. Jiang, W. Xue, J.-Y. Hong, J.-T. Zhang, M.-J. Li, S.-N. Yu, J.-H. He, H.-Y. Hu, The  
371 N-terminal dimerization is required for TDP-43 splicing activity. *Sci. Rep.* **7**, 6196 (2017).

372 38. A. Wang, A. E. Conicella, H. B. Schmidt, E. W. Martin, S. N. Rhoads, A. N. Reeb, A.  
373 Nourse, D. Ramirez Montero, V. H. Ryan, R. Rohatgi, F. Shewmaker, M. T. Naik, T.  
374 Mittag, Y. M. Ayala, N. L. Fawzi, A single N-terminal phosphomimic disrupts TDP-43  
375 polymerization, phase separation, and RNA splicing. *EMBO J.* **37** (2018),  
376 doi:10.15252/embj.201797452.

377 39. R. C. Hergesheimer, A. A. Chami, D. R. De Assis, P. Vourc’h, C. R. Andres, P. Corcia, D.  
378 Lanznaster, H. Blasco, The debated toxic role of aggregated TDP-43 in amyotrophic lateral  
379 sclerosis: A resolution in sight? *Brain.* **142** (2019), pp. 1176–1194.

380 40. Y. M. Ayala, L. De Conti, S. E. Avendaño-Vázquez, A. Dhir, M. Romano, A.  
381 D’Ambrogio, J. Tollervy, J. Ule, M. Baralle, E. Buratti, F. E. Baralle, TDP-43 regulates  
382 its mRNA levels through a negative feedback loop. *EMBO J.* **30**, 277–288 (2011).

383 41. S. C. Ling, C. P. Albuquerque, J. S. Han, C. Lagier-Tourenne, S. Tokunaga, H. Zhou, D.  
384 W. Cleveland, ALS-associated mutations in TDP-43 increase its stability and promote  
385 TDP-43 complexes with FUS/TLS. *Proc Natl Acad Sci U S A.* **107**, 13318–13323 (2010).

386 42. B. N. Flores, X. Li, A. M. Malik, J. Martinez, A. A. Beg, S. J. Barmada, An Intramolecular  
387 Salt Bridge Linking TDP43 RNA Binding, Protein Stability, and TDP43-Dependent  
388 Neurodegeneration. *Cell Rep.* **27**, 1133-1150.e8 (2019).

389 43. G. G. Jayaraj, M. S. Hipp, F. U. Hartl, Functional Modules of the Proteostasis Network.  
390 *Cold Spring Harb. Perspect. Biol.* **12** (2020), doi:10.1101/cshperspect.a033951.

391 44. L. Wang, L. Lim, M. Dang, J. Song, A novel mechanism for ATP to enhance the functional  
392 oligomerization of TDP-43 by specific binding. *Biochem. Biophys. Res. Commun.* **514**,  
393 809–814 (2019).

394 45. S. Mallik, S. Kundu, Topology and Oligomerization of Mono- and Oligomeric Proteins  
395 Regulate Their Half-Lives in the Cell. *Structure.* **26**, 869-878.e3 (2018).

396 46. A. R. Dörrbaum, L. Kochen, J. D. Langer, E. M. Schuman, Local and global influences on  
397 protein turnover in neurons and glia. *Elife.* **7**, e34202 (2018).

398 47. E. S. Pinarbasi, T. Cağatay, H. Y. J. Fung, Y. C. Li, Y. M. Chook, P. J. Thomas, Active  
399 nuclear import and passive nuclear export are the primary determinants of TDP-43  
400 localization. *Sci. Rep.* **8**, 7083 (2018).



- 001 48. S. Kroschwald, S. Maharana, S. Alberti, Hexanediol: a chemical probe to investigate the  
002 material properties of membrane-less compartments. *Matters*. **3**, e201702000010 (2017).
- 003 49. A. E. Conicella, G. L. Dignon, G. H. Zerze, H. B. Schmidt, A. M. D'Ordine, Y. C. Kim, R.  
004 Rohatgi, Y. M. Ayala, J. Mittal, N. L. Fawzi, *Proc. Natl. Acad. Sci.*, in press,  
005 doi:10.1073/pnas.1912055117.
- 006 50. S. Maharana, J. Wang, D. K. Papadopoulos, D. Richter, A. Pozniakovsky, I. Poser, M.  
007 Bickle, S. Rizk, J. Guillén-Boixet, T. M. Franzmann, M. Jahnel, L. Marrone, Y.-T. Chang,  
008 J. Sternecker, P. Tomancak, A. A. Hyman, S. Alberti, RNA buffers the phase separation  
009 behavior of prion-like RNA binding proteins. *Science*. **360**, 918–921 (2018).
- 010 51. L. McGurk, E. Gomes, L. Guo, J. Shorter, N. Bonini, Poly(ADP-ribose) engages the TDP-  
011 43 nuclear-localization sequence to regulate granulo-filamentous aggregation.  
012 *Biochemistry* (2018), doi:10.1021/acs.biochem.8b00910.
- 013 52. C. Foglieni, S. Papin, A. Salvade, T. Afroz, S. Pinton, G. Pedrioli, G. Ulrich, M.  
014 Polymenidou, P. Paganetti, Split GFP technologies to structurally characterize and quantify  
015 functional biomolecular interactions of FTD-related proteins. *Sci Rep*. **7**, 14013 (2017).
- 016 53. T. Chujo, T. Yamazaki, T. Hirose, Architectural RNAs (arcRNAs): A class of long  
017 noncoding RNAs that function as the scaffold of nuclear bodies. *Biochim. Biophys. Acta -*  
018 *Gene Regul. Mech.* **1859**, 139–146 (2016).
- 019 54. S. P. Shevtsov, M. Dunder, Nucleation of nuclear bodies by RNA. *Nat. Cell Biol.* **13**, 167–  
020 173 (2011).
- 021 55. F.-M. Boisvert, M. J. Hendzel, D. P. Bazett-Jones, Promyelocytic Leukemia (Pml) Nuclear  
022 Bodies Are Protein Structures That Do Not Accumulate RNA. *J. Cell Biol.* **148**, 283–292  
023 (2000).
- 024 56. K. Izumikawa, Y. Nobe, H. Ishikawa, Y. Yamauchi, M. Taoka, K. Sato, H. Nakayama, R.  
025 J. Simpson, T. Isobe, N. Takahashi, TDP-43 regulates site-specific 2'-O-methylation of U1  
026 and U2 snRNAs via controlling the Cajal body localization of a subset of C/D scaRNAs.  
027 *Nucleic Acids Res.* **47**, 2487–2505 (2019).
- 028 57. L. J. P., P. Olga, T. J. C., W. P. C., TDP-43 repression of nonconserved cryptic exons is  
029 compromised in ALS-FTD. *Science*. **349**, 650–655 (2015).
- 030 58. G. Rot, Z. Wang, I. Huppertz, M. Modic, T. Lenče, M. Hallegger, N. Haberman, T. Curk,  
031 C. von Mering, J. Ule, High-Resolution RNA Maps Suggest Common Principles of  
032 Splicing and Polyadenylation Regulation by TDP-43. *Cell Rep.* **19**, 1056–1067 (2017).
- 033 59. S. E. Avendaño-Vázquez, A. Dhir, S. Bembich, E. Buratti, N. Proudfoot, F. E. Baralle,  
034 Autoregulation of TDP-43 mRNA levels involves interplay between transcription, splicing,  
035 and alternative polyA site selection. *Genes Dev.* **26**, 1679–1684 (2012).
- 036 60. A. C. Elden, H.-J. Kim, M. P. Hart, A. S. Chen-Plotkin, B. S. Johnson, X. Fang, M.  
037 Armakola, F. Geser, R. Greene, M. M. Lu, A. Padmanabhan, D. Clay-Falcone, L.  
038 McCluskey, L. Elman, D. Juhr, P. J. Gruber, U. Rüb, G. Auburger, J. Q. Trojanowski, V.  
039 M.-Y. Lee, V. M. Van Deerlin, N. M. Bonini, A. D. Gitler, Ataxin-2 intermediate-length  
040 polyglutamine expansions are associated with increased risk for ALS. *Nature*. **466**, 1069–  
041 1075 (2010).

- 142 61. M. Hiji, T. Takahashi, H. Fukuba, H. Yamashita, T. Kohriyama, M. Matsumoto, White  
143 matter lesions in the brain with frontotemporal lobar degeneration with motor neuron  
144 disease: TDP-43-immunopositive inclusions co-localize with p62, but not ubiquitin. *Acta*  
145 *Neuropathol.* **116**, 183–191 (2008).
- 146 62. F. F., S. F., T. S., G. R., K. R., S. T., C. J., J. R., H. F. U., H. M. S., The nucleolus  
147 functions as a phase-separated protein quality control compartment. *Science.* **365**, 342–347  
148 (2019).
- 149 63. J. A. Johnston, C. L. Ward, R. R. Kopito, Aggresomes: A Cellular Response to Misfolded  
150 Proteins . *J. Cell Biol.* **143**, 1883–1898 (1998).
- 151 64. G. Matsumoto, T. Inobe, T. Amano, K. Murai, N. Nukina, N. Mori, N-Acyldopamine  
152 induces aggresome formation without proteasome inhibition and enhances protein  
153 aggregation via p62/SQSTM1 expression. *Sci. Rep.* **8**, 9585 (2018).
- 154 65. S. M. Lee, S. Asress, C. M. Hales, M. Gearing, J. C. Vizcarra, C. N. Fournier, D. A.  
155 Gutman, L.-S. Chin, L. Li, J. D. Glass, TDP-43 cytoplasmic inclusion formation is  
156 disrupted in C9orf72-associated amyotrophic lateral sclerosis/frontotemporal lobar  
157 degeneration. *Brain Commun.* **1**, fcz014–fcz014 (2019).
- 158 66. A. D. Foster, L. L. Flynn, C. Cluning, F. Cheng, J. M. Davidson, A. Lee, N. Polain, R.  
159 Mejzini, N. Farrawell, J. J. Yerbury, R. Layfield, P. A. Akkari, S. L. Rea, p62  
160 overexpression induces TDP-43 cytoplasmic mislocalisation, aggregation and cleavage and  
161 neuronal death. *Sci. Rep.* **11**, 11474 (2021).
- 162 67. S. Watanabe, H. Inami, K. Oiwa, Y. Murata, S. Sakai, O. Komine, A. Sobue, Y. Iguchi, M.  
163 Katsuno, K. Yamanaka, Aggresome formation and liquid–liquid phase separation  
164 independently induce cytoplasmic aggregation of TAR DNA-binding protein 43. *Cell*  
165 *Death Dis.* **11**, 909 (2020).
- 166 68. V. Romano, Z. Quadri, F. E. Baralle, E. Buratti, The structural integrity of TDP-43 N-  
167 terminus is required for efficient aggregate entrapment and consequent loss of protein  
168 function. *Prion.* **9**, 1–9 (2015).
- 169 69. H. Sasaguri, J. Chew, Y. F. Xu, T. F. Gendron, A. Garrett, C. W. Lee, K. Jansen-West, P.  
170 O. Bauer, E. A. Perkerson, J. Tong, C. Stetler, Y. J. Zhang, The extreme N-terminus of  
171 TDP-43 mediates the cytoplasmic aggregation of TDP-43 and associated toxicity in vivo.  
172 *Brain Res.* **1647**, 57–64 (2016).
- 173 70. R. L. French, Z. R. Grese, H. Aligireddy, D. D. Dhavale, A. N. Reeb, N. Kedia, P. T.  
174 Kotzbauer, J. Bieschke, Y. M. Ayala, Detection of TAR DNA-binding protein 43 (TDP-  
175 43) oligomers as initial intermediate species during aggregate formation. *J Biol Chem*  
176 (2019), doi:10.1074/jbc.RA118.005889.
- 177 71. M. Neumann, I. R. Mackenzie, N. J. Cairns, P. J. Boyer, W. R. Markesbery, C. D. Smith, J.  
178 P. Taylor, H. A. Kretschmar, V. E. Kimonis, M. S. Forman, TDP-43 in the ubiquitin  
179 pathology of frontotemporal dementia with VCP gene mutations. *J Neuropathol Exp*  
180 *Neurol.* **66**, 152–157 (2007).
- 181 72. N. J. Cairns, M. Neumann, E. H. Bigio, I. E. Holm, D. Troost, K. J. Hatanpaa, C. Foong, C.  
182 L. White 3rd, J. A. Schneider, H. A. Kretschmar, D. Carter, L. Taylor-Reinwald, K.  
183 Paulsmeyer, J. Strider, M. Gitcho, A. M. Goate, J. C. Morris, M. Mishra, L. K. Kwong, A.

- 184 Stieber, Y. Xu, M. S. Forman, J. Q. Trojanowski, V. M.-Y. Lee, I. R. A. Mackenzie, TDP-  
185 43 in familial and sporadic frontotemporal lobar degeneration with ubiquitin inclusions.  
186 *Am. J. Pathol.* **171**, 227–240 (2007).
- 187 73. K. A. Josephs, A. Stroh, B. Dugger, D. W. Dickson, Evaluation of subcortical pathology  
188 and clinical correlations in FTL-D-U subtypes. *Acta Neuropathol.* **118**, 349–358 (2009).
- 189 74. P. S. Gallagher, S. V Clowes Candadai, R. G. Gardner, The requirement for Cdc48/p97 in  
190 nuclear protein quality control degradation depends on the substrate and correlates with  
191 substrate insolubility. *J. Cell Sci.* **127**, 1980–1991 (2014).
- 192 75. J. van Eersel, Y. D. Ke, A. Gladbach, M. Bi, J. Götz, J. J. Kril, L. M. Ittner, Cytoplasmic  
193 Accumulation and Aggregation of TDP-43 upon Proteasome Inhibition in Cultured  
194 Neurons. *PLoS One.* **6**, e22850 (2011).
- 195 76. T. A. Shelkovernikova, M. S. Kukharsky, H. An, P. Dimasi, S. Alexeeva, O. Shabir, P. R.  
196 Heath, V. L. Buchman, Protective paraspeckle hyper-assembly downstream of TDP-43 loss  
197 of function in amyotrophic lateral sclerosis. *Mol. Neurodegener.* **13**, 30 (2018).
- 198 77. Y. Nishimoto, S. Nakagawa, T. Hirose, H. J. Okano, M. Takao, S. Shibata, S. Suyama, K.  
199 Kuwako, T. Imai, S. Murayama, N. Suzuki, H. Okano, The long non-coding RNA nuclear-  
200 enriched abundant transcript 1\_2 induces paraspeckle formation in the motor neuron during  
201 the early phase of amyotrophic lateral sclerosis. *Mol. Brain.* **6**, 31 (2013).
- 202 78. T. J. Cohen, A. W. Hwang, C. R. Restrepo, C. X. Yuan, J. Q. Trojanowski, V. M. Lee, An  
203 acetylation switch controls TDP-43 function and aggregation propensity. *Nat Commun.* **6**,  
204 5845 (2015).
- 205 79. H.-J. Chen, S. D. Topp, H. S. Hui, E. Zacco, M. Katarya, C. McLoughlin, A. King, B. N.  
206 Smith, C. Troakes, A. Pastore, C. E. Shaw, RRM adjacent TARDBP mutations disrupt  
207 RNA binding and enhance TDP-43 proteinopathy. *Brain* (2019),  
208 doi:10.1093/brain/awz313.
- 209 80. A. Boveris, A. Navarro, Brain mitochondrial dysfunction in aging. *IUBMB Life.* **60**, 308–  
210 314 (2008).
- 211 81. M. Hruska-Plochan, K. M. Betz, S. Ronchi, V. I. Wiersma, Z. Maniecka, E.-M. Hock, F.  
212 Laferriere, S. Sahadevan, V. Hoop, I. Delvendahl, M. Panatta, A. van der Bourg, D.  
213 Bohaciakova, K. Frontzek, A. Aguzzi, T. Lashley, M. D. Robinson, T. Karayannis, M.  
214 Mueller, A. Hierlemann, M. Polymenidou, *bioRxiv*, in press,  
215 doi:10.1101/2021.12.08.471089.
- 216 82. K. Suzuki, P. Bose, R. Y. Y. Leong-Quong, D. J. Fujita, K. Riabowol, REAP: A two  
217 minute cell fractionation method. *BMC Res. Notes.* **3**, 294 (2010).
- 218 83. A. N. Coyne, V. Baskerville, B. L. Zaepfel, D. W. Dickson, F. Rigo, F. Bennett, C. P.  
219 Lusk, J. D. Rothstein, Nuclear accumulation of CHMP7 initiates nuclear pore complex  
220 injury and subsequent TDP-43 dysfunction in sporadic and familial ALS. *Sci. Transl. Med.*  
221 **13**, eabe1923 (2021).
- 222 84. A. M. Bolger, M. Lohse, B. Usadel, Trimmomatic: a flexible trimmer for Illumina  
223 sequence data. *Bioinformatics.* **30**, 2114–2120 (2014).
- 224 85. A. Dobin, C. A. Davis, F. Schlesinger, J. Drenkow, C. Zaleski, S. Jha, P. Batut, M.

- 125 Chaisson, T. R. Gingeras, STAR: ultrafast universal RNA-seq aligner. *Bioinformatics*. **29**,  
126 15–21 (2013).
- 127 86. Y. Liao, G. K. Smyth, W. Shi, featureCounts: an efficient general purpose program for  
128 assigning sequence reads to genomic features. *Bioinformatics*. **30**, 923–930 (2014).
- 129 87. M. I. Love, W. Huber, S. Anders, Moderated estimation of fold change and dispersion for  
130 RNA-seq data with DESeq2. *Genome Biol.* **15**, 550 (2014).
- 131 88. S. Anders, A. Reyes, W. Huber, Detecting differential usage of exons from RNA-seq data.  
132 *Genome Res.* **22**, 2008–2017 (2012).
- 133 89. C. Türker, F. Akal, D. Joho, C. Panse, S. Barkow-Oesterreicher, H. Rehrauer, R.  
134 Schlapbach, in *Proceedings of the 13th International Conference on Extending Database*  
135 *Technology* (Association for Computing Machinery, New York, NY, USA, 2010;  
136 <https://doi.org/10.1145/1739041.1739135>), *EDBT '10*, pp. 717–720.
- 137 90. D. Bates, M. Mächler, B. M. Bolker, S. C. Walker, Fitting linear mixed-effects models  
138 using lme4. *J. Stat. Softw.* (2015), doi:10.18637/jss.v067.i01.
- 139 91. A. Kuznetsova, P. B. Brockhoff, R. H. B. Christensen, lmerTest Package: Tests in Linear  
140 Mixed Effects Models . *J. Stat. Softw.* (2017), doi:10.18637/jss.v082.i13.
- 141 92. Y. Benjamini, Y. Hochberg, Controlling the False Discovery Rate: A Practical and  
142 Powerful Approach to Multiple Testing. *J. R. Stat. Soc. Ser. B* (1995), doi:10.1111/j.2517-  
143 6161.1995.tb02031.x.
- 144 93. J. Schindelin, I. Arganda-Carreras, E. Frise, V. Kaynig, M. Longair, T. Pietzsch, S.  
145 Preibisch, C. Rueden, S. Saalfeld, B. Schmid, J.-Y. Tinevez, D. J. White, V. Hartenstein,  
146 K. Eliceiri, P. Tomancak, A. Cardona, Fiji: an open-source platform for biological-image  
147 analysis. *Nat. Methods*. **9**, 676–682 (2012).
- 148 94. E. L. Scotter, C. Vance, A. L. Nishimura, Y.-B. Lee, H.-J. Chen, H. Urwin, V. Sardone, J.  
149 C. Mitchell, B. Rogelj, D. C. Rubinsztein, C. E. Shaw, Differential roles of the ubiquitin  
150 proteasome system and autophagy in the clearance of soluble and aggregated TDP-43  
151 species. *J. Cell Sci.* **127**, 1263–1278 (2014).
- 152 95. I. Arganda-Carreras, V. Kaynig, C. Rueden, K. W. Eliceiri, J. Schindelin, A. Cardona, H.  
153 Sebastian Seung, Trainable Weka Segmentation: a machine learning tool for microscopy  
154 pixel classification. *Bioinformatics*. **33**, 2424–2426 (2017).
- 155 96. C. Fouquet, J.-F. Gilles, N. Heck, M. Dos Santos, R. Schwartzmann, V. Cannaya, M.-P.  
156 Morel, R. S. Davidson, A. Trembleau, S. Bolte, Improving axial resolution in confocal  
157 microscopy with new high refractive index mounting media. *PLoS One*. **10**, e0121096–  
158 e0121096 (2015).
- 159 97. M. Tanikawa, K. Sanjiv, T. Helleday, P. Herr, O. Mortusewicz, The spliceosome U2  
160 snRNP factors promote genome stability through distinct mechanisms; transcription of  
161 repair factors and R-loop processing. *Oncogenesis*. **5**, e280–e280 (2016).
- 162 98. C.-Y. Liao, W. Smet, G. Brunoud, S. Yoshida, T. Vernoux, D. Weijers, Reporters for  
163 sensitive and quantitative measurement of auxin response. *Nat. Methods*. **12**, 207–210  
164 (2015).



- 165 99. M. A. White, E. Kim, A. Duffy, R. Adalbert, B. U. Phillips, O. M. Peters, J. Stephenson, S.  
166 Yang, F. Massenzio, Z. Lin, S. Andrews, A. Segonds-Pichon, J. Metterville, L. M. Saksida,  
167 R. Mead, R. R. Ribchester, Y. Barhomi, T. Serre, M. P. Coleman, J. R. Fallon, T. J.  
168 Bussey, R. H. J. Brown, J. Sreedharan, TDP-43 gains function due to perturbed  
169 autoregulation in a Tardbp knock-in mouse model of ALS-FTD. *Nat. Neurosci.* **21**, 552–  
170 563 (2018).
- 171 100. P. A. Paganetti, M. Lis, H.-W. Klafki, M. Staufenbiel, Amyloid precursor protein truncated  
172 at any of the  $\gamma$ -secretase sites is not cleaved to  $\beta$ -amyloid. *J. Neurosci. Res.* **46**, 283–293  
173 (1996).

174

## 175 Acknowledgments

176 We thank Prof. Benjamin Schuler (Department of Biochemistry, University of Zurich) for  
177 critical feedback on this work and Dr. Matthias Gstaiger (Institute of Molecular Systems  
178 Biology, ETH Zurich, Switzerland) for sharing the Flp-In T-REx HEK293 cell line and the  
179 pOG44 plasmid. We gratefully acknowledge the support from the Proteomics team at the  
180 Functional Genomics Center Zurich (FGCZ) from the University of Zurich (UZH),  
181 especially Dr. Paolo Nanni, Dr. Serge Chesnov and Dr. Witold Wolski. We also like to  
182 thank Dr. Jana Doehner, Dr. Joana Delgado Martins, Dr. José María Mateos Melero and  
183 Johannes Riemann from the Center for Microscopy and Image Analysis (ZMB) at the  
184 University of Zurich UZH for their kind help with image acquisition and analysis. We are  
185 grateful to Dr. Erik Slabber for his technical advice on cloning and PLA and help during  
186 manuscript preparation, and to our fellow Polymenidou lab members for the continuous and  
187 fruitful discussions on the project.

188 **Funding:** This work was supported by the Swiss National Science Foundation (grants  
189 PP00P3\_144862 and PP00P3\_176966 to MP), the National Centre for Competence in  
190 Research (NCCR) RNA & Disease and a Sinergia grant (CRSII5\_170976 11). M.P.-B.  
191 received a Candoc Grant (Forschungskredit) from the University of Zurich. V.I.W. is  
192 supported by the FEBS Long-Term Fellowship. P.D.R. received a Career Development  
193 Award from the Stiftung Synapsis – Alzheimer Forschung Schweiz. S.S. was supported by  
194 a Swiss Government Excellence Scholarship for Foreign Scholars.

195 **Author contributions:** M.P.-B performed plasmid cloning unless stated otherwise below,  
196 developed all stable isogenic HEK cell lines and carried out the corresponding experiments  
197 on them, including sample preparation for transcriptomics and proteomics. V.I.W. cultured  
198 the human neural networks, cloned LV transfer plasmids, produced lentiviral vectors and  
199 performed experiments on neurons and mutNLS isogenic HEK lines. A.Z. performed the  
00 full-length TDP-43-MBP protein purification, its corresponding plasmid cloning and *in*  
01 *vitro* experiments. L.D.V. provided cell culture support and performed  
02 immunocytochemistry experiments on isogenic HEK lines. C.F. performed triFC  
03 experiments on HeLa cells and its corresponding plasmid cloning. U.W. performed the  
04 RNA-seq analysis. I.M. and K.M.B. supported the RNA-seq analysis. A.C. performed the  
05 purification of TDP-43 RRM and the NMR experiments. J.W. and Z.G. provided cell  
06 culture support. P.D.R. helped with the colocalization studies of nuclear markers and E.T.  
07 with the PLA. R.M. supported plasmid cloning and R.R. protein purification and *in vitro*  
08 experiments. S.S. and O.S. provided technical feedback. M.H.-P. provided samples of  
09 human neural networks, overall cell culture and experimental support and critical input on  
10 the study. F.H.-T.A., P.P. and M.P. provided supervision. M.P.-B, V.I.M., A.Z. and M.P.

11 wrote and edited the manuscript and prepared the figures. M.P. directed the study. All  
12 authors read, edited and approved the final manuscript.

13 **Conflict of interests:** The authors declare that they have no conflict of interests.

14 **Data and materials availability:** All data needed to evaluate the conclusions in the paper  
15 are present in the paper and/or the Supplementary Materials. Proteomics data will be  
16 deposited to the ProteomeXchange Consortium via the PRIDE partner repository and the  
17 transcriptomics data will be deposited to the Gene Expression Omnibus (GEO) genomics  
18 data repository.

1

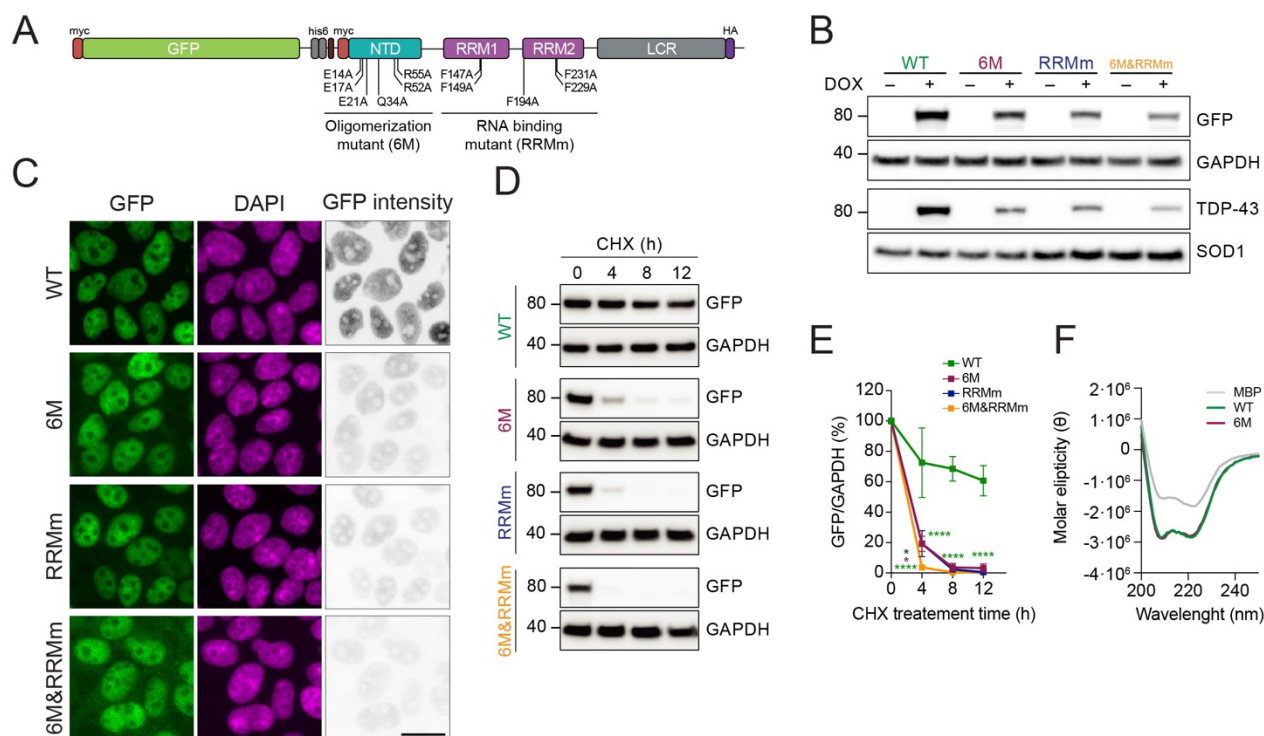

2

**Figure 1. Oligomerization and RNA-binding cooperatively stabilize the half-life of TDP-43.** (A) Schematic representation depicting the specific mutations used to disrupt oligomerization and/or RNA binding on the GFP-TDP-43 variants, used to develop the inducible, isogenic cell lines. (B) Western blot analysis of the generated isogenic cell lines described in A after inducing GFP-TDP-43 expression for 48 h showing the tightness of the doxycycline (DOX)-modulated expression system. Note also the different protein levels of the expressed variants. (C) Representative images of widefield fluorescence microscopy of the isogenic HEK293 cell lines depicted in B. GFP brightness is adjusted in each condition for optimal visualization of GFP-TDP-43 localization. Original intensity values are represented in the right column using grayscale. Scale bar: 20  $\mu$ m. (D) GFP-TDP-43 expression was induced with DOX for 24 h before cycloheximide (CHX) treatment for the indicated times and western blot analysis. (E) Quantification of the GFP signal from D. N=3 independent experiments. Two-way ANOVA with Tukey's multiple comparisons post hoc test. (F) Average far-UV CD spectra of purified TDP-43-MBP variants from N=3 independent experiments. \*\*\*\* p<0.0001. Graph bars represent mean  $\pm$  SD.

19

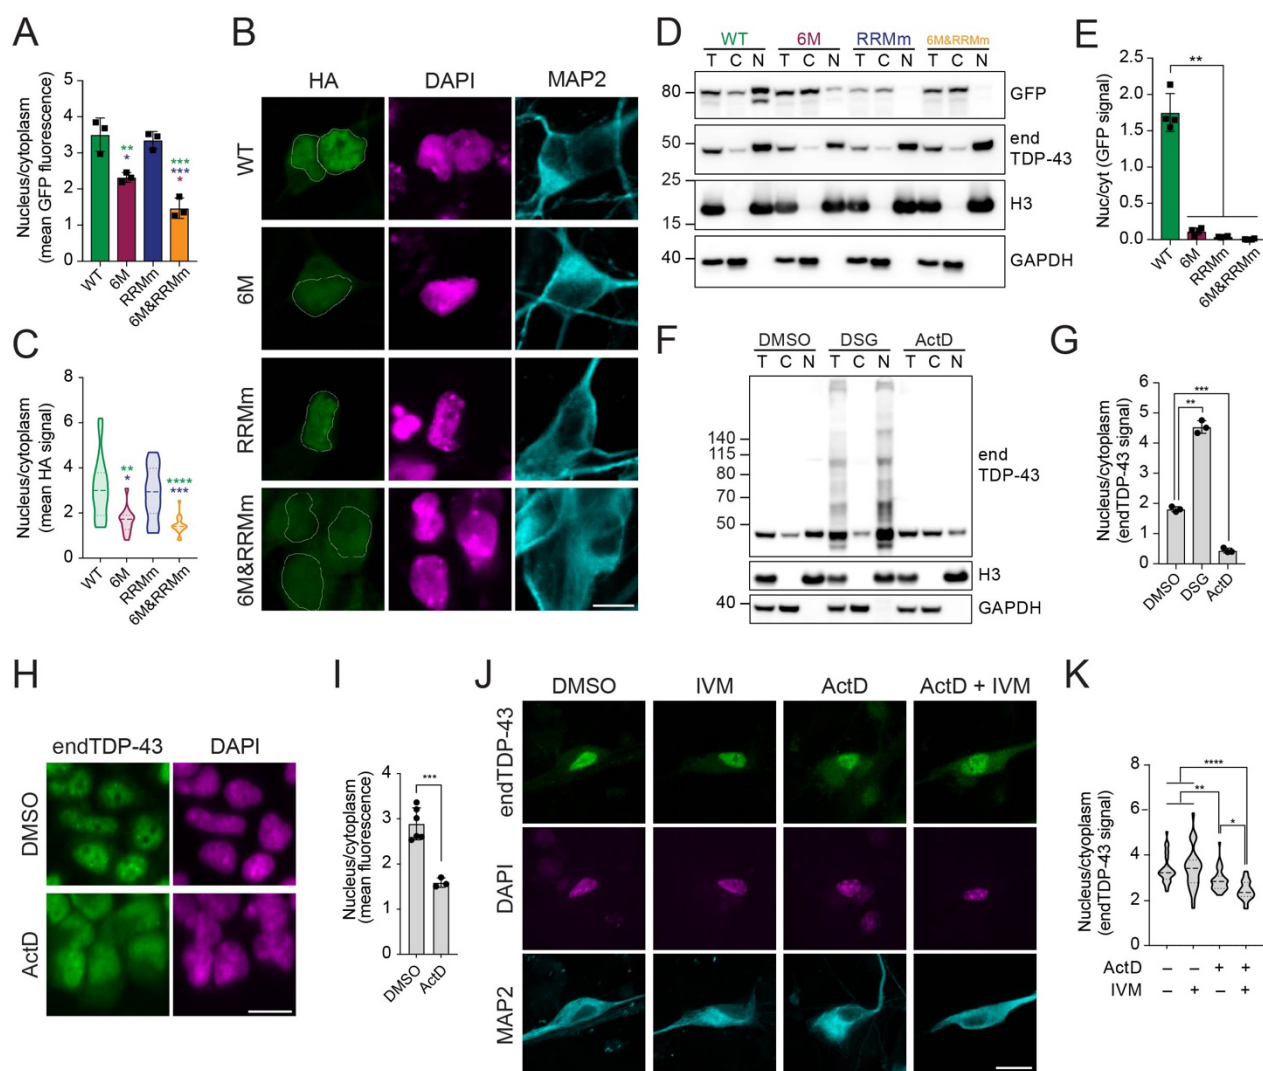

**Figure 2. TDP-43 oligomerization and RNA-binding preserve its nuclear localization.**

(A) Quantification of nucleocytoplasmic levels of GFP-TDP-43 in the immunocytochemistry images shown in Figure 1C. N=3 independent experiments. One-way ANOVA with Tukey's multiple comparisons post hoc test. (B) Representative image of confocal fluorescence imaging of human neurons transduced with TDP-43-HA variants. Scale bar: 10  $\mu$ m. (C) Quantification of nucleocytoplasmic levels of TDP-43-HA in the immunocytochemistry images shown in B. N=14-20 cells. Kruskal-Wallis test with Dunn's multiple comparisons post hoc test. (D) GFP-TDP-43 expression was induced with doxycycline (DOX) for 4 h before nucleocytoplasmic fractionation and subsequent analysis of GFP-TDP-43 and endogenous TDP-43 (endDP-43) by western blot. T: total lysate, C: cytoplasmic fraction, N: nuclear fraction. (E) Quantification of the GFP signal from Figure 2D. Repeated measures one-way ANOVA with Greenhouse-Geisser correction and Tukey's multiple comparisons post hoc test. cyt: cytoplasm, nuc: nucleus. (F) Representative images of widefield fluorescence microscopy of HEK293 cells treated with ActD for 4 h. Scale bar: 20  $\mu$ m. (G) Quantification of F. N=3 independent experiments. Unpaired two-tailed *t*-test. (H) HEK293 cells were treated with ActD to inhibit transcription or subjected to protein-protein cross-link with DSG followed by nucleocytoplasmic fractionation and western blot analysis. T: total lysate, C: cytoplasmic fraction, N: nuclear fraction. (I) Quantification of



41 endTDP-43 signal shown in H. N=3 independent experiments. Repeated measures  
42 one-way ANOVA with Greenhouse-Geisser correction and Dunnett's multiple  
43 comparisons post hoc test. **(J)** Representative images of confocal fluorescence  
44 microscopy of human neural cultures treated with actinomycin D (ActD) and  
45 ivermectin (IVM). Scale bar: 20  $\mu$ m. **(K)** Quantification of nucleocytoplasmic levels  
46 of endTDP-43 in the immunocytochemistry images shown in J. Kruskal-Wallis test  
47 with Dunn's multiple comparisons post hoc test. N=23-48 fields corresponding to a  
48 total of 351-569 neurons per condition. \* p<0.05, \*\* p<0.01, \*\*\* p<0.001,  
49 \*\*\*\* p<0.0001. Graph bars represent mean  $\pm$  SD. Violin plots show mean and  
50 quartiles.

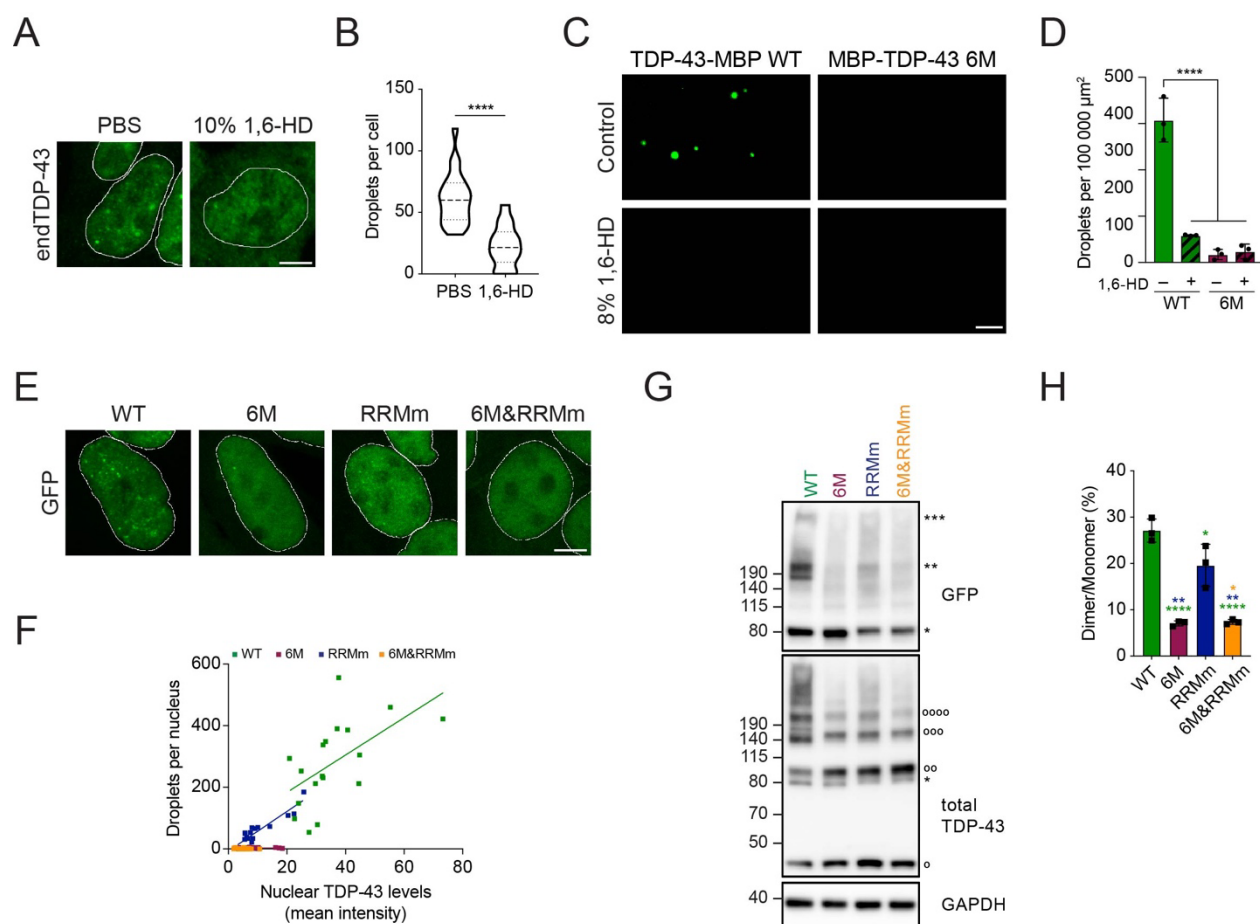

**Figure 3. Oligomerization is required for physiological LLPS of TDP-43 in the nucleus.**

(A) Representative maximum intensity Z-projections from confocal fluorescence imaging (thickness of ~10  $\mu\text{m}$ , in steps of 0.21  $\mu\text{m}$ ) of WT HEK293 cells after mock or 1,6-HD treatment for 15 min stained for endogenous TDP-43 (endTDP-43). Scale bar: 5  $\mu\text{m}$ . (B) Quantification of three-dimensional (3D) reconstructions from the Z-stack confocal microscopy images shown in A depicting the number of nuclear droplets per cell in the conditions described in A. N=14-23 cells. Unpaired two-tailed *t*-test. (C) Fluorescence microscopy images of 10  $\mu\text{M}$  purified MBP-tagged full-length TDP-43 and its oligomerization-deficient counterpart showing different abilities to undergo LLPS and its disruption by 1,6-HD treatment for 10 min. Scale bar: 10  $\mu\text{m}$ . (D) Quantification of the number of droplets in the conditions shown in C per 100 000  $\mu\text{m}^2$  field. N=3 independent experiments. One-way ANOVA with Tukey's multiple comparisons post hoc test. (E) Representative maximum intensity Z-projections (thickness of ~10  $\mu\text{m}$ , in steps of 0.21  $\mu\text{m}$ ) from confocal fluorescence microscopy of the isogenic cell lines expressing GFP-TDP-43 for 48 h with doxycycline (DOX). Scale bar: 5  $\mu\text{m}$ . (F) 3D quantification of the number of nuclear droplets per cell shown in E. N=16-22 cells. (G) GFP-TDP-43 expression was induced with DOX for 4 h before crosslinking protein-protein interactions with DSG and subsequent analysis by western blot. \*, \*\* and \*\*\* indicate GFP-TDP-43 monomers, dimers and trimers, respectively.  $^{\circ}$ ,  $^{\circ\circ}$ ,  $^{\circ\circ\circ}$  and  $^{\circ\circ\circ\circ}$  indicate endTDP-43 monomers, dimers, trimers and tetramers. (H) Quantification of GFP-TDP-43 dimer/monomer ratio based on the GFP signal from G. N=3 independent experiments. Repeated measures one-way ANOVA with Greenhouse-Geisser correction and Tukey's multiple comparisons post hoc test. \*  $p < 0.05$ , \*\*  $p < 0.01$ ,

51

52

53

54

55

56

57

58

59

60

61

62

63

64

65

66

67

68

69

70

71

72

73

74

75

76

\*\*\*\*  $p < 0.0001$ . Graph bars represent mean  $\pm$  SD. Violin plots show mean and quartiles.

77

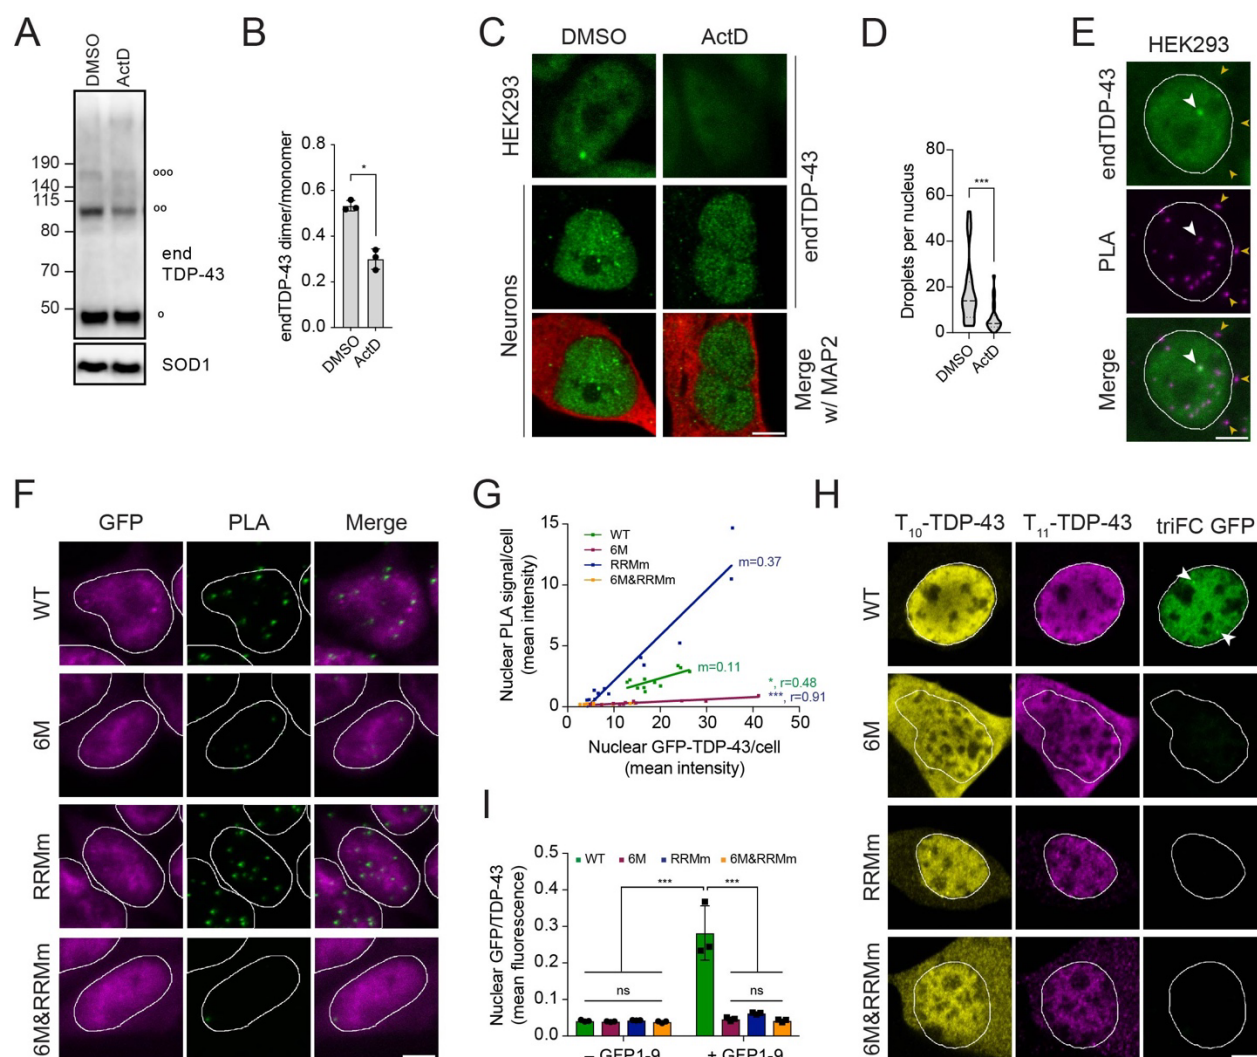

**Figure 4. Loss of RNA binding leads to conformationally distinct TDP-43 oligomers.**

(A) HEK293 cells were treated with ActD for 4 h to inhibit transcription before treatment with the protein-protein cross-linker DSG and western blot analysis. °, °° and °°°° indicate endogenous TDP-43 (endTDP-43) monomers, dimers and trimers, respectively. (B) Quantification of the endTDP-43 signal from A. N=3 independent experiments. Paired two-tailed *t*-test. (C) Representative image of confocal fluorescence microscopy of HEK293 cells and neurons treated with ActD. Scale bar: 5  $\mu$ m. (D) Single-plane quantification of the number of nuclear droplets per neuron in the conditions described in C. N=25-26 cells. Mann-Whitney U test. (E) Proximity ligation assay (PLA) using a monoclonal anti-TDP-43 antibody reveals nuclear and cytoplasmic localization of endTDP-43 dimers in physiological conditions. Big white arrowheads indicate overlapping GFP-TDP-43 droplets and PLA signal. Small yellow arrowheads indicate cytoplasmic PLA signal. Scale bar: 5  $\mu$ m. (F) PLA using a monoclonal anti-GFP antibody reveals the localization of GFP-TDP-43 dimers in the isogenic cell lines upon protein expression with doxycycline (DOX) for 48 h. Note the absence of dimers in the oligomerization-deficient variant (6M). Scale bar: 5  $\mu$ m. (G) Quantification of the nuclear PLA signal shown in G correlated to the protein expression levels of the different TDP-43 variants, measured as the mean GFP fluorescence. N=11-13 cells. (H) Tripartite GFP complementation assay using a pair of N-terminally T<sub>10</sub>- and T<sub>11</sub>-tagged TDP-43 constructs co-transfected with GFP<sub>1-9</sub> in motoneuron-like NSC-34 cells. triFC:



00 trimolecular fluorescence complementation. Scale bar: 5  $\mu\text{m}$  **(I)** Quantification of  
01 the GFP fluorescence levels relative to the T<sub>10</sub>/T<sub>11</sub>-TDP-43 expression levels as  
02 shown in H. N=3 replicates, with N=6-35 cells per replicate. Two-way ANOVA  
03 with Tukey's multiple comparisons post hoc test. \* p<0.05, \*\*\* p<0.001. Graph bars  
04 represent mean  $\pm$  SD. Violin plots show mean and quartiles.

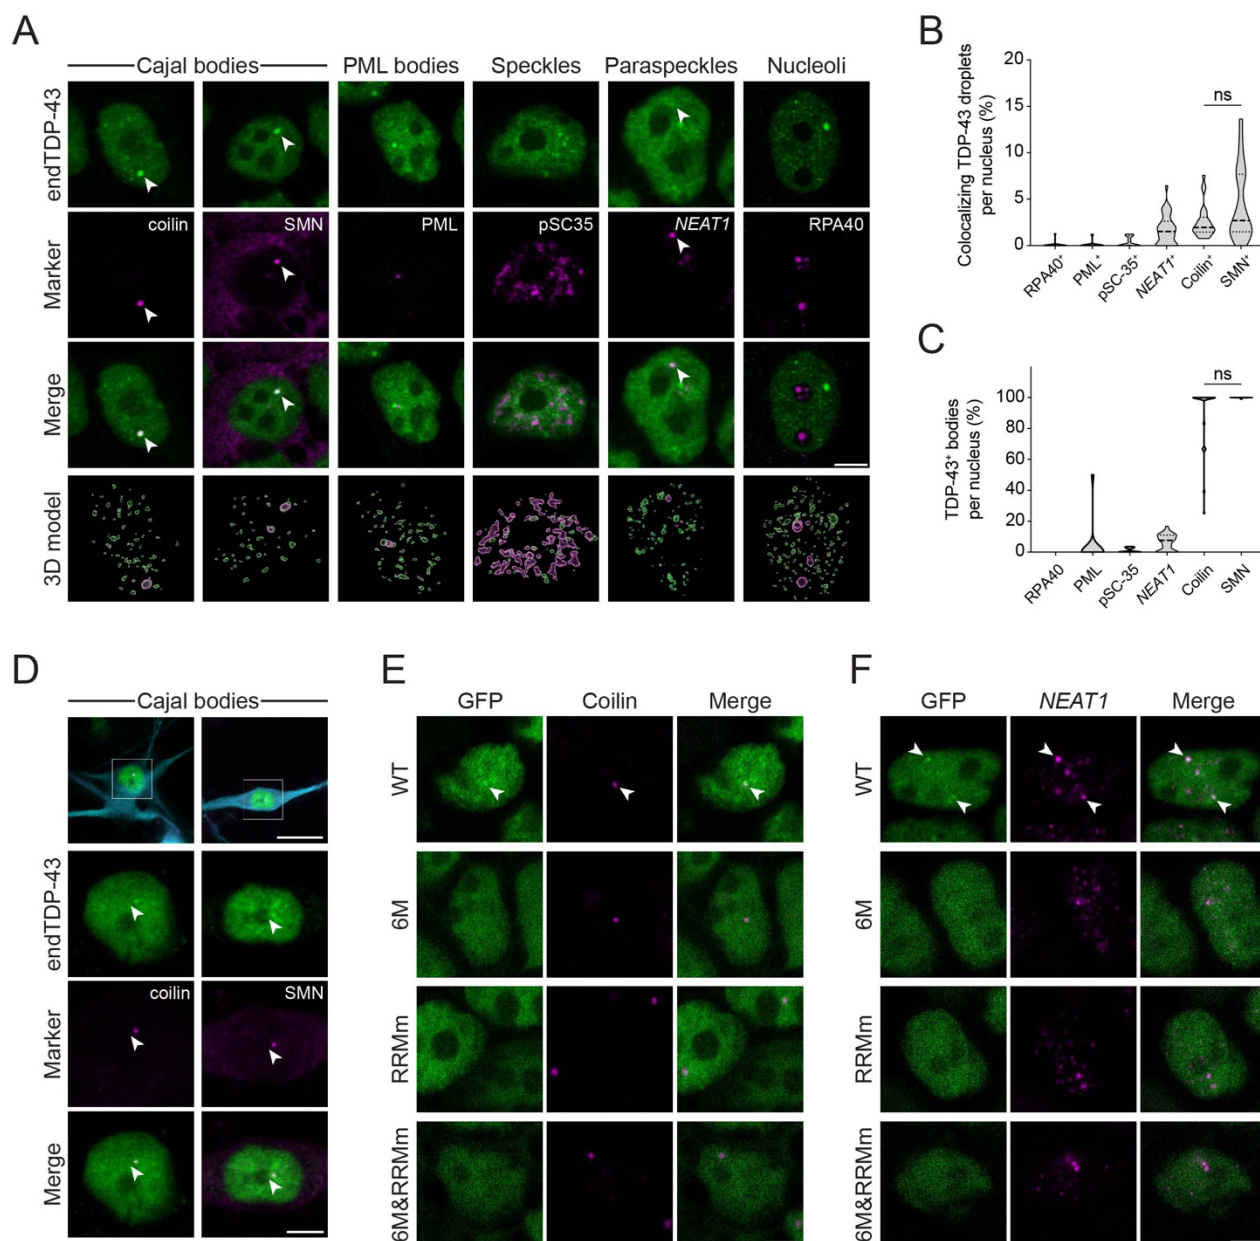

**Figure 5. Cajal bodies and paraspeckles are the main TDP-43-containing nuclear bodies.** (A) Representative confocal microscopy images of HEK293 cells probed for endogenous TDP-43 (endTDP-43) and different subnuclear compartment markers. Lower panel shows the three-dimensional (3D) reconstruction of the endogenous TDP-43 (endTDP-43) droplets and the indicated nuclear body obtained from the confocal Z-stacks. Scale bar: 5  $\mu$ m. (B) Quantification of the 3D reconstructions shown in A depicting the percentage of nuclear TDP-43 droplets colocalizing with markers of subnuclear compartments. N=14-38 cells. (C) Quantification of 3D reconstructions shown in A depicting the percentage of each of the analyzed subnuclear compartments that colocalize with endogenous TDP-43. N=14-38 cells. (D) Representative confocal microscopy images of human neurons showing the presence of TDP-43 in Cajal bodies. Scale bar: 20  $\mu$ m (inset: 5  $\mu$ m). (E) Representative confocal microscopy images of the isogenic HEK293 lines expressing the different GFP-TDP-43 variants for 24 h and stained for the Cajal body marker coilin. Scale bar: 5  $\mu$ m. (F) Representative confocal microscopy images of the isogenic HEK293 lines expressing the different GFP-TDP-43 variants

22

for 24 h and hybridized with a fluorescent *NEAT1* probe to mark the paraspeckles.

23

Scale bar: 5  $\mu$ m.

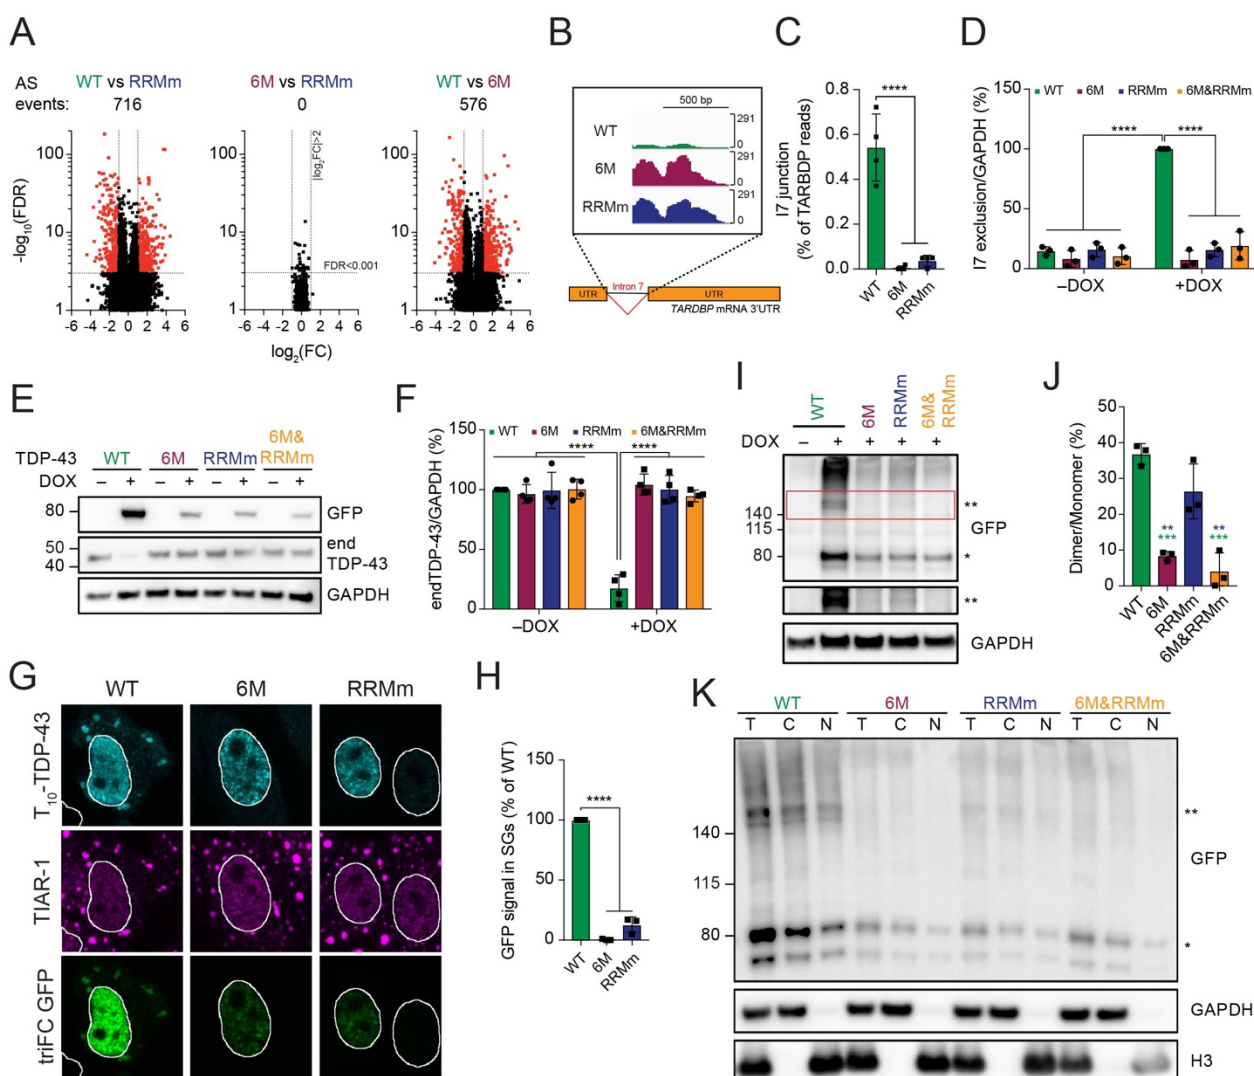

**Figure 6. TDP-43 oligomerization is required for splicing regulation in the nucleus and stress granule incorporation in the cytoplasm.** (A) Volcano plots showing alternative splicing events upon expression of GFP-TDP-43 variants for 48 h. (B) RNA sequencing (RNA-seq) coverage across the intron 7 of the *TARDBP* gene, showing a strong decrease in the WT, but not the mutant, GFP-TDP-43-expressing cells. AS events: alternative splicing events. (C) Quantification of the RNA-seq reads spanning the intron 7 junction. One-way ANOVA with Tukey's multiple comparisons post hoc test. (D) Endogenous TDP-43 (endTDP-43) intron 7 exclusion levels after expression of the GFP-TDP-43 variants for 48 h in the isogenic cell lines measured by qPCR with primers specifically targeted to the transcripts excluding this region. Two-way ANOVA with Tukey's multiple comparisons post hoc test. (E) Western blot analysis of the isogenic HEK293 after GFP-TDP-43 expression for 48 h showing that only the WT variant regulates endTDP-43 levels. (F) Quantification of the endTDP-43 signal from E. N=4 independent experiments. Two-way ANOVA with Tukey's multiple comparisons post hoc test. (G) Tripartite GFP complementation assay using a pair of N-terminally T<sub>10</sub>- and T<sub>11</sub>-tagged TDP-43 constructs co-transfected with GFP<sub>1-9</sub> in HeLa cells and subjected to arsenite stress for 30 min. TriFC: trimolecular fluorescence complementation. Scale bar: 10  $\mu$ m. (H) Quantification of the signal trimolecular fluorescence complementation (triFC) of GFP in the TIA-1-marked SGs from the immunocytochemistry images shown in G. N=3 independent experiments. Repeated measures one-way ANOVA



46 with Greenhouse-Geisser correction and Tukey's multiple comparisons post hoc  
47 test. **(I)** Expression of GFP-TDP-43 mutNLS variants was induced with  
48 doxycycline (DOX) for 4 h before crosslinking protein-protein interactions with  
49 DSG and subsequent analysis by western blot. \* and \*\* indicate GFP-TDP-43  
50 monomers and dimers, respectively. **(J)** Quantification of the GFP signal from I.  
51 N=3 independent experiments. Repeated measures one-way ANOVA with  
52 Greenhouse-Geisser correction and Tukey's multiple comparisons post hoc test. **(K)**  
53 After expression of GFP-TDP-43 mutNLS variants for 48 h, HEK293 cells were  
54 treated with DSG to cross-link protein-protein interactions before performing  
55 nucleocytoplasmic fractionation and western blot analysis. \* and \*\* indicate GFP-  
56 TDP-43 monomers and dimers, respectively. \*\* p<0.01, \*\*\* p<0.001,  
57 \*\*\*\* p<0.001. Graph bars represent mean  $\pm$  SD.

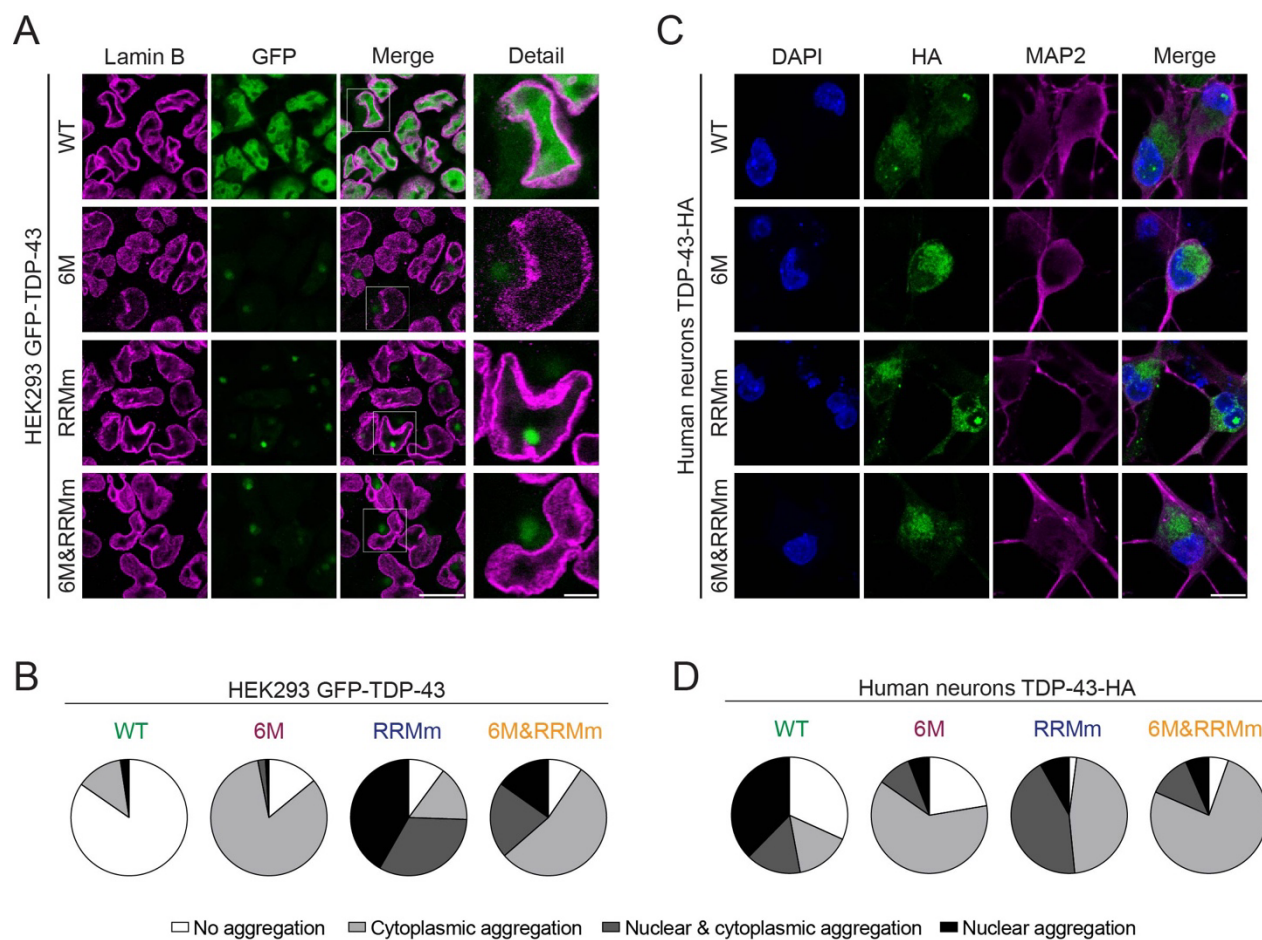

**Figure 7. Loss of RNA binding or oligomerization differentially modulate the subcellular localization of TDP-43 inclusions.** (A) Representative confocal microscopy images of the isogenic GFP-TDP-43 lines after 48 h of expression, treated with the proteasome inhibitor MG132 for the last 24 h and stained for lamin B to mark the nuclear envelope. Note the different localization of TDP-43 inclusions in the oligomerization- (6M and 6M&RRMm, cytoplasmic) versus RNA binding-deficient (RRMm, nuclear) variants. Scale bar: 20  $\mu$ m (5  $\mu$ m for inset). (B) Quantification of the differentially localized GFP-TDP-43 inclusions after MG132 treatment for the different variants in the isogenic HEK lines as shown in A. Represented values are averages from N=3 replicates, with N=189-497 cells quantified per condition and replicate. (C) Representative maximum intensity Z-projections from confocal fluorescence imaging (thickness of 4  $\mu$ m, in steps of 1  $\mu$ m) of human neurons transduced with TDP-43-HA variants and treated overnight with the proteasome inhibitor MG132. Scale bar: 10  $\mu$ m. (D) Quantification of the differentially localized TDP-43-HA inclusions in human neurons as described in C. Represented values correspond to the quantification of N=85-97 neurons from two independent experiments.

58

59

60

61

62

63

64

65

66

67

68

69

70

71

72

73

74

75

76

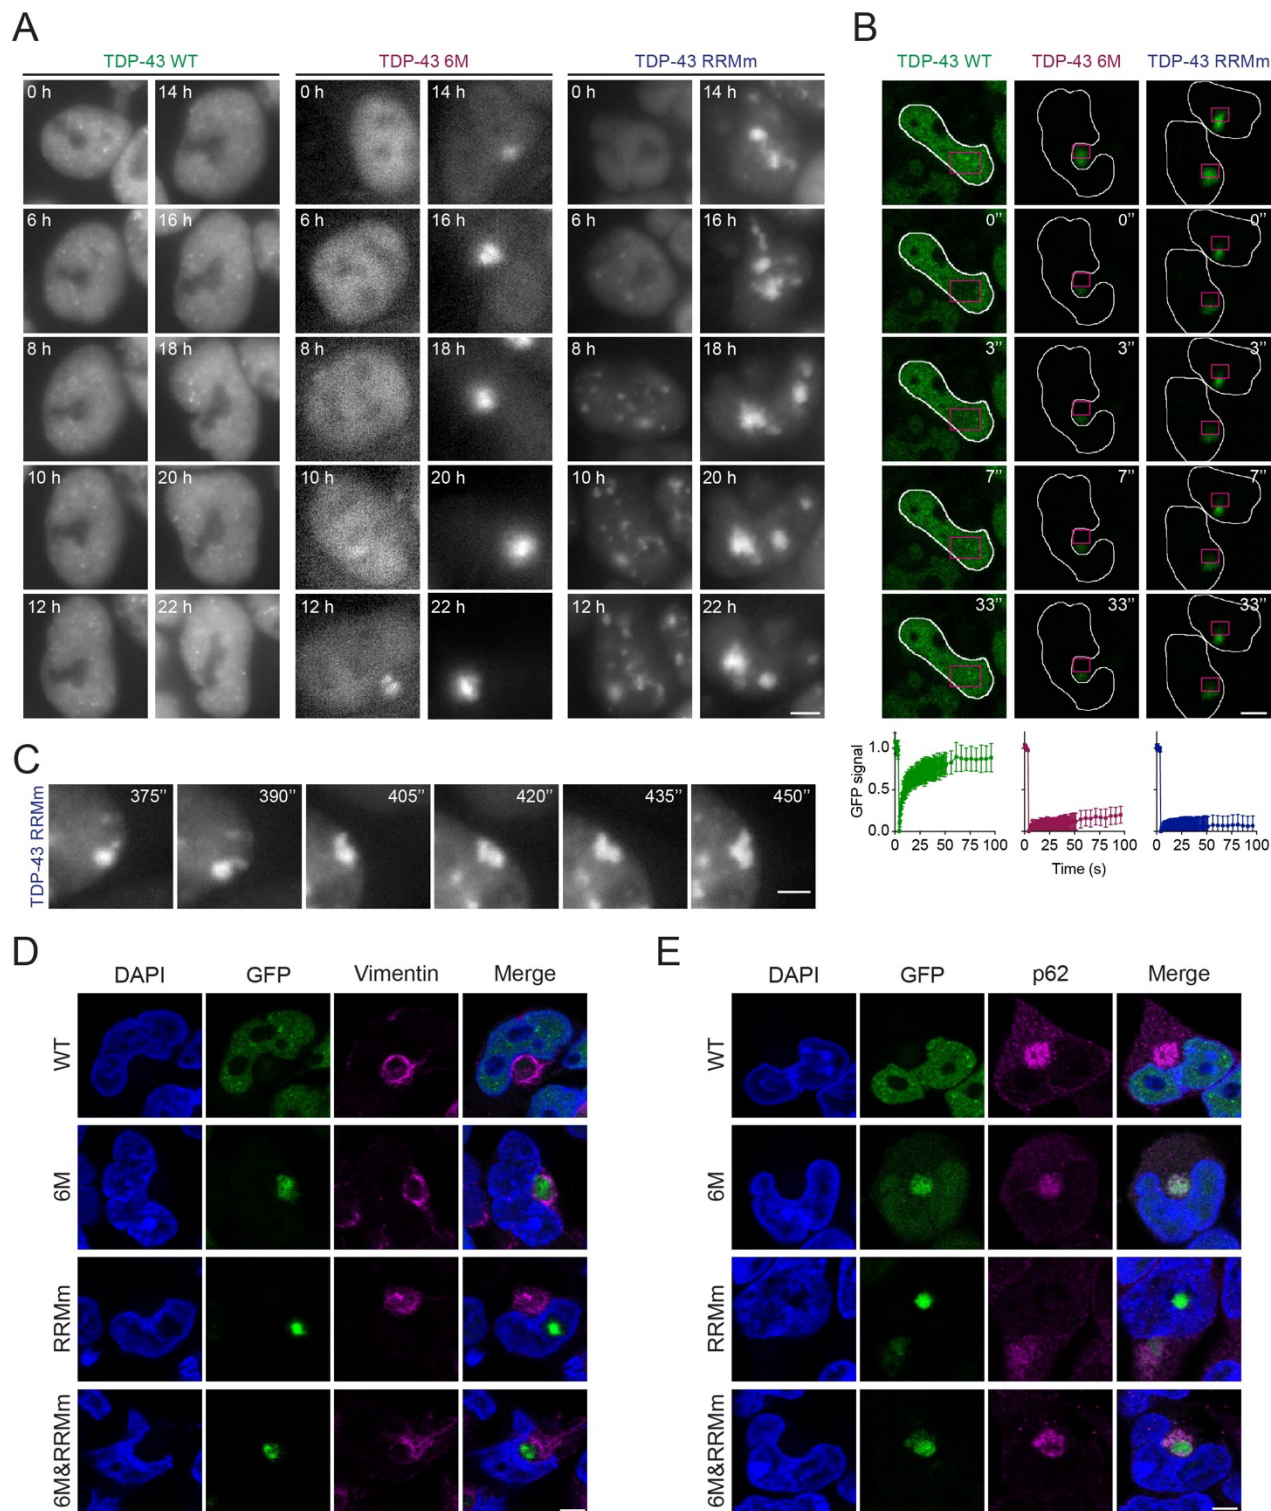

**Figure 8. TDP-43 aggregates in an LLPS- or an aggresome-dependent manner in the nucleus and cytoplasm, respectively.** (A) Representative images of live widefield fluorescence microscopy over the course of the MG132 treatment of the isogenic GFP-TDP-43 lines in the conditions described in Figure 7A. Numbers in images indicate the experimental time point in hours (h) of MG132 treatment. Scale bar: 5  $\mu$ m. (B) Representative fluorescent confocal microscopy images of FRAP experiments in the GFP-TDP-43 aggregates originated upon MG132 treatment as described in Figure 7A. FRAP was performed in the areas highlighted in magenta.

86 Bottom panel: Measured GFP values are expressed as a fraction of the average pre-  
87 bleach fluorescence levels. Scale bar: 5  $\mu\text{m}$ . **(C)** Live widefield fluorescence  
88 microscopy depicting a fusion event and aberrant phase transition of RRMm GFP-  
89 TDP-43 droplets upon MG132 treatment in the conditions described in Figure 7A.  
90 Scale bar: 3  $\mu\text{m}$ . **(D)** Representative confocal microscopy images of the isogenic  
91 GFP-TDP-43 lines in the conditions described in figure 7A and stained for vimentin.  
92 Scale bar: 5  $\mu\text{m}$ . **(E)** Representative confocal microscopy images of the isogenic  
93 GFP-TDP-43 lines in the conditions described in Figure 7A and stained for p62.  
94 Scale bar: 5  $\mu\text{m}$ .



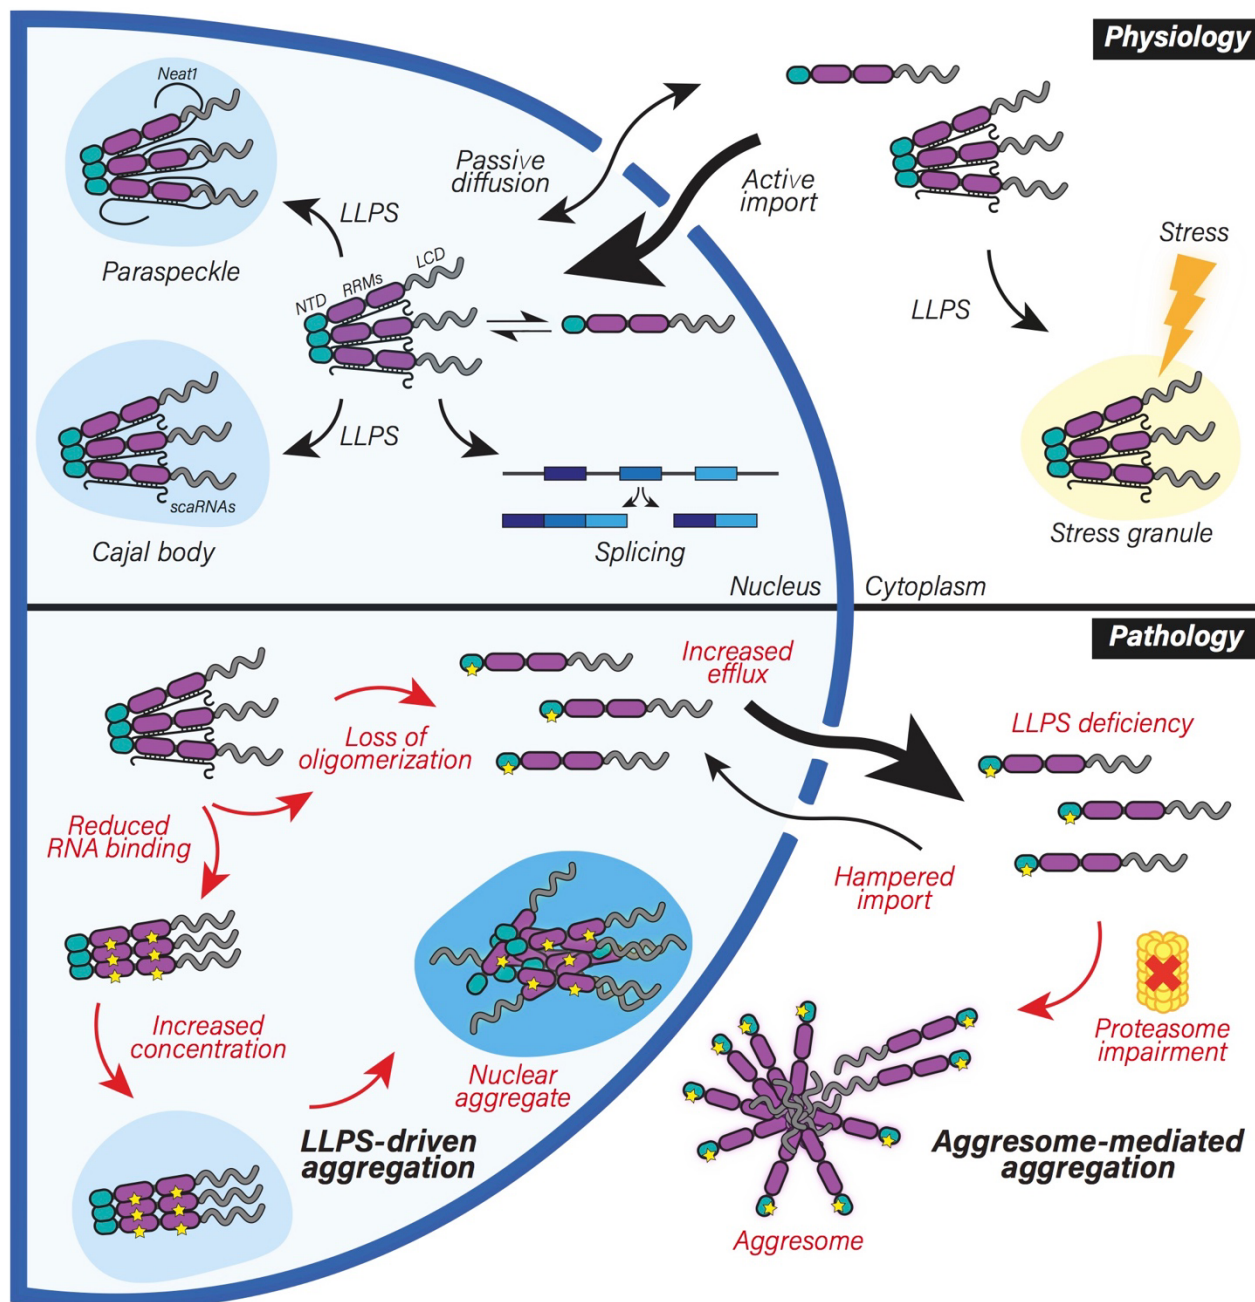

95  
96  
97  
98  
99  
100  
101  
102  
103  
104  
105  
106  
107  
108  
109

**Figure 9. Oligomerization and RNA-binding enable TDP-43 physiological functions and their disruption drives nuclear and cytoplasmic aggregate formation via distinct pathways.** Schematic representation of the role of NTD-driven oligomerization and RNA binding in TDP-43 physiology and pathology. **Upper panel:** In healthy cells, TDP-43 monomers and oligomers are in a dynamic equilibrium. TDP-43 is actively imported into the nucleus (12), where oligomerization and RNA binding retain it in large macromolecular complexes, limiting passive outflow. In the nucleus, oligomerization and RNA binding are key for the essential roles of TDP-43 in RNA processing, including alternative splicing. Furthermore, oligomerization enables the LLPS of TDP-43 and in conjunction with binding to specific RNAs –such as small Cajal body-specific RNAs (scaRNAs) (56) and *NEATI* (20, 21)– allows its localization to distinct subnuclear compartments, primarily Cajal bodies and paraspeckles. TDP-43 oligomers are also detected in the cytoplasm, where its LLPS-mediated incorporation into SGs under stress conditions



!10 depends on both oligomerization and RNA binding. **Lower panel:** In disease, loss  
!11 of TDP-43 oligomerization or RNA binding increases the nuclear efflux of LLPS-  
!12 deficient monomers, disrupts its inclusion into nuclear bodies, leads to  
!13 transcriptome-wide splicing alterations (including TDP-43 auto-regulation) and  
!14 drives TDP-43 aggregation via two independent pathways. Upon failure of the  
!15 ubiquitin-proteasome degradation machinery observed with aging and in  
!16 ALS/FTLD patients (2, 3, 43), monomeric TDP-43 aggregates in an aggresome-  
!17 dependent manner in the cytoplasm. Notably, the known decline in active nuclear  
!18 import in disease (83) would further exacerbate TDP-43 cytoplasmic accumulation.  
!19 In the nucleus, loss of TDP-43 RNA-binding results in enhanced formation of both  
!20 monomers that escape to the cytoplasm and conformationally distinct TDP-43  
!21 oligomers. When the concentration rises (e.g. due to the aforementioned  
!22 proteasomal failure), RNA-binding deficiency modulates TDP-43 LLPS,  
!23 culminating in the formation of nuclear aggregates via an LLPS-mediated pathway.  
!24 Taken together, RNA binding and oligomerization allow TDP-43 to maintain its  
!25 localization and function in physiology and their disruption drives LLPS-dependent  
!26 and aggresome-dependent aggregation pathways in the nucleus and cytoplasm,  
!27 respectively. LCD: low complexity domain, LLPS: liquid-liquid phase separation,  
!28 NTD: N-terminal domain, RRM: RNA recognition motifs.
